# Supplementary material for: The curious case of co-planarity in di-nuclear triel complexes: a density functional investigation
Source: Royal Society of Chemistry journal article supplement (doi:10.1039/d4dt02453b), 2024-10-31
Supplement: d4dt02453b1.pdf [file d4dt02453b1.pdf]

## Supporting Information

# The Curious Case of Co-Planarity in Di-nuclear Triel Complexes: A Density Functional Investigation

Mayank Khara,<sup>†,‡</sup> and Neetu Goel<sup>\*,†</sup>

<sup>†</sup> Computational and Theoretical Chemistry Group, Department of Chemistry & Centre for Advanced Studies in Chemistry, Panjab University, Chandigarh-160014, India

<sup>‡</sup> Department of Applied Science, Chandigarh College of Engineering, CGC-Jhanjheri, Mohali, 140307

E-mail: [neetugoel@pu.ac.in](mailto:neetugoel@pu.ac.in)

**Table S1 : Interaction energy and Triel bond length calculated for di-nuclear Al complex (1) at three functionals and def2TZVP basis set.**

| S.No | Method           | Interaction energy (kcal/mol) | Triel Bond length (Å) |
|------|------------------|-------------------------------|-----------------------|
| 1    | B97D/def2tzvp    | -11.6                         | 2.60                  |
| 2    | M06/def2tzvp     | -11.7                         | 2.59                  |
| 3    | PBE0-D3/def2tzvp | -12.0                         | 2.59                  |

**Table S2 : Topological parameters for triel bond (Tr..X) and C-H..X interaction present in di-nuclear complexes and their respective rotamers.**

| S.No | Metal | Substituent      | Tr..X                               |                          |                          | C-H..X                              |                          |                          |
|------|-------|------------------|-------------------------------------|--------------------------|--------------------------|-------------------------------------|--------------------------|--------------------------|
|      |       |                  | $\Delta^2\rho \times 10^{-2}$ (a.u) | $V \times 10^{-2}$ (a.u) | $K \times 10^{-2}$ (a.u) | $\Delta^2\rho \times 10^{-2}$ (a.u) | $V \times 10^{-2}$ (a.u) | $K \times 10^{-2}$ (a.u) |
| 1    | Al    | -OMe             | 3.30                                | 0.85                     | 0.79                     | 0.21                                | 3.0                      | 1.9                      |
| 2    | Al    | -OEt             | 3.30                                | 0.90                     | 0.28                     | 0.38                                | 9.0                      | 1.7                      |
| 3    | Al    | -OH              | 3.00                                | 0.69                     | 0.40                     | 0.37                                | 9.3                      | 2.1                      |
| 4    | Al    | -OPh             | 6.60                                | 1.70                     | 0.52                     | 0.38                                | 9.8                      | 2.6                      |
| 5    | Al    | -NH <sub>2</sub> | 4.60                                | 1.50                     | 0.19                     | 0.38                                | 9.8                      | 3.9                      |
| 6    | Al    | -SH              | 2.20                                | 1.00                     | 0.24                     | 0.35                                | 8.7                      | 1.7                      |
| 7    | Al    | -F               | 0.99                                | 0.30                     | 0.28                     | 0.36                                | 8.9                      | 3.9                      |
| 8    | Al    | -Cl              | 0.30                                | 0.74                     | 0.87                     | 0.40                                | 7.5                      | 2.4                      |
| 9    | B     | -OMe             | 5.4                                 | 0.65                     | 0.56                     | 2.5                                 | 0.35                     | 0.14                     |
| 10   | Ga    | -OMe             | 4.6                                 | 0.74                     | 0.89                     | 2.2                                 | 0.31                     | 0.12                     |
| 11   | In    | -OMe             | 4.9                                 | 1.24                     | 0.95                     | 2.0                                 | 0.28                     | 0.13                     |
| 12   | Tl    | -OMe             | 6.2                                 | 1.30                     | 0.76                     | 2.8                                 | 0.41                     | 0.15                     |

Figure S1: (a) MEP surface plots of rotamer di-nuclear Al complexes and the magnitude of sigma-hole present on trial atom in kcal/mol.

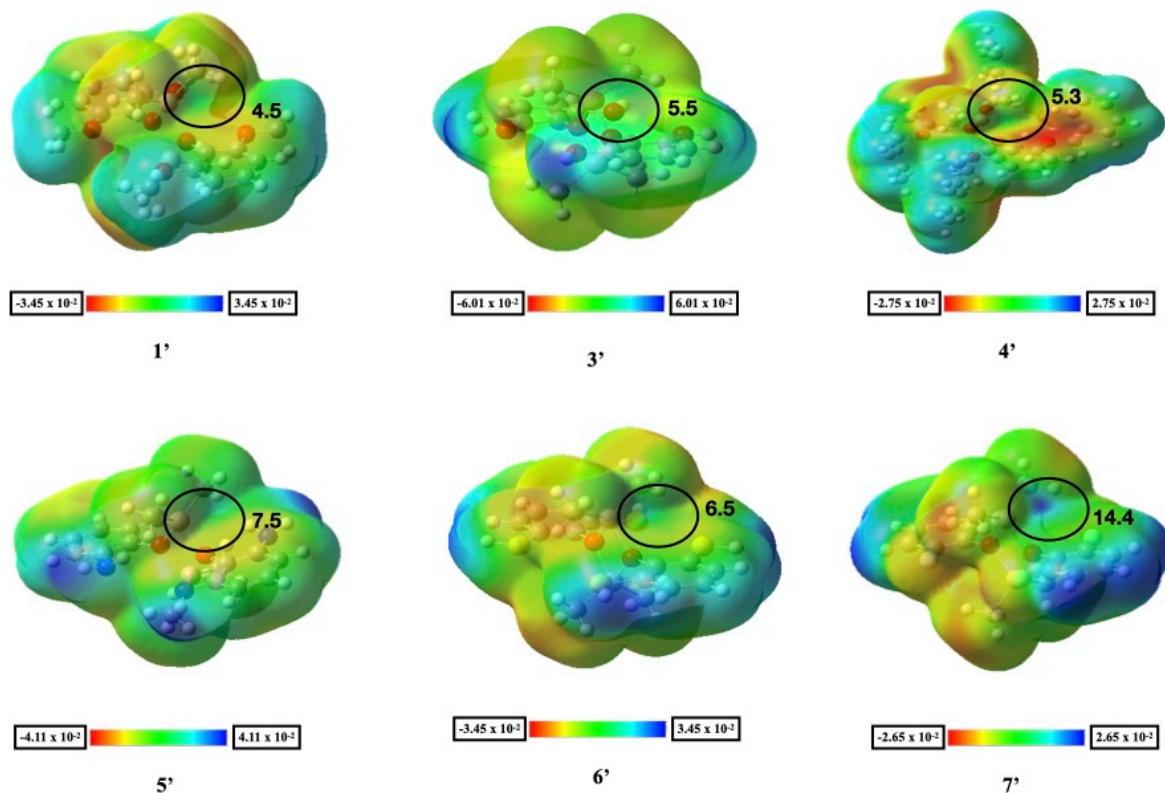

(b) MEP surface plots of rotamer di-nuclear complexes of B, Ga, In & Tl (9'-12') and the magnitude of sigma-hole present on trial atom in kcal/mol.

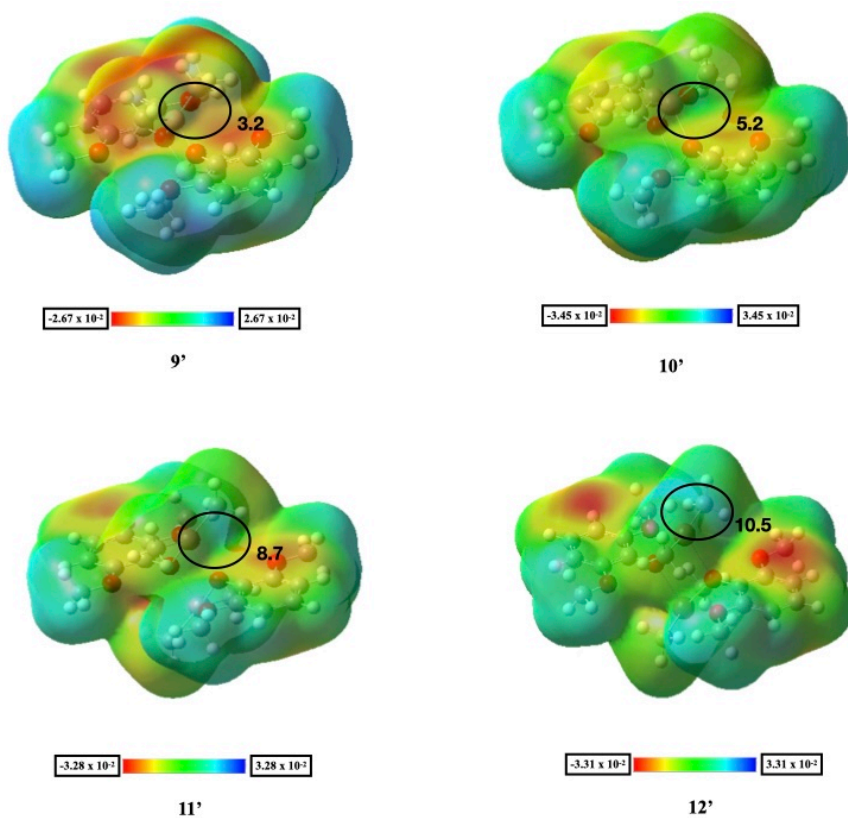

Figure S2: (a) Optimized Structures of d-nuclear Al complexes (**1** and **3**) and its rotamer (**1'** and **3'**)

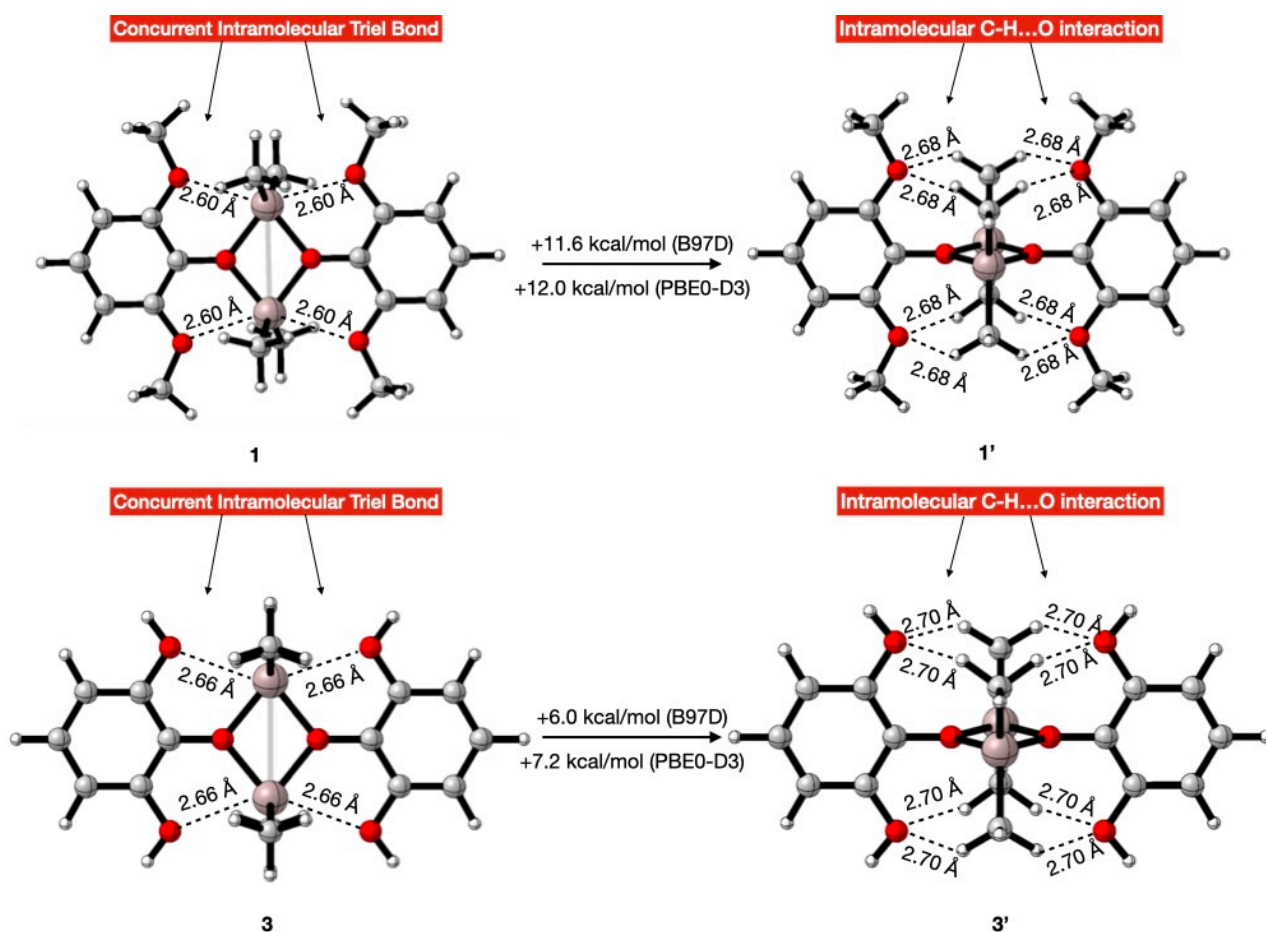

(b) Optimized Structures of d-nuclear Al complexes (**4** and **5**) and its rotamer (**4'** and **5'**)

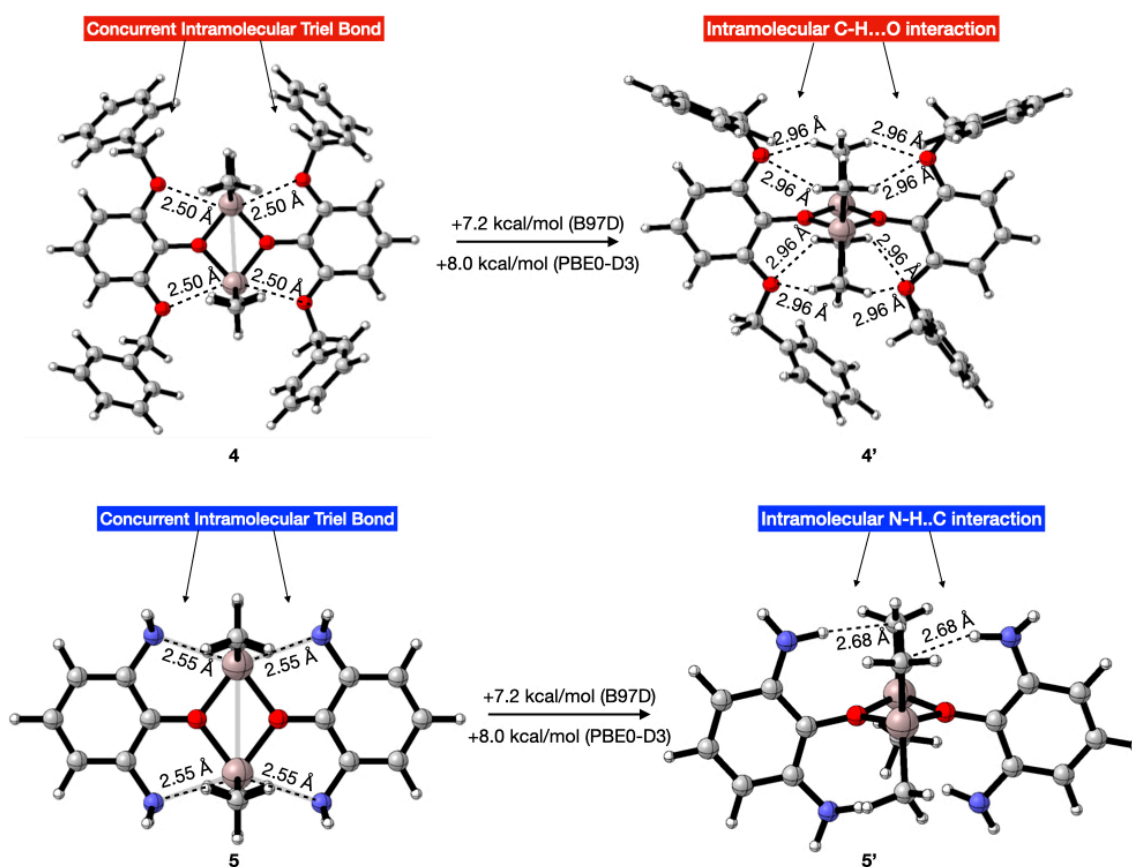

(c) Optimized Structures of d-nuclear Al complexes (**6 and 7**) and its rotamer (**6' and 7'**)

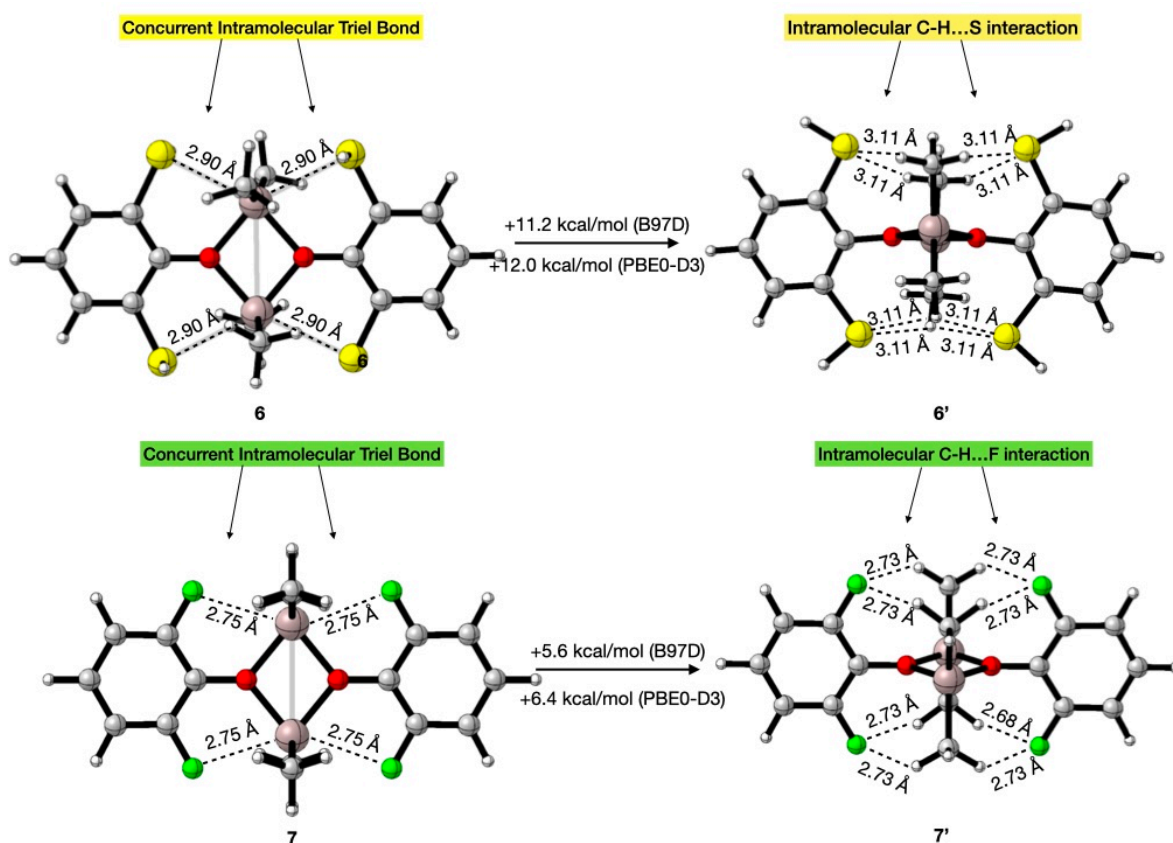

Figure S3 : (a) AIM molecular graphs of di-nuclear complexes of Al (**1 and 3**) and its corresponding rotamer (**1' and 3'**) with  $\rho$  at BCP provided

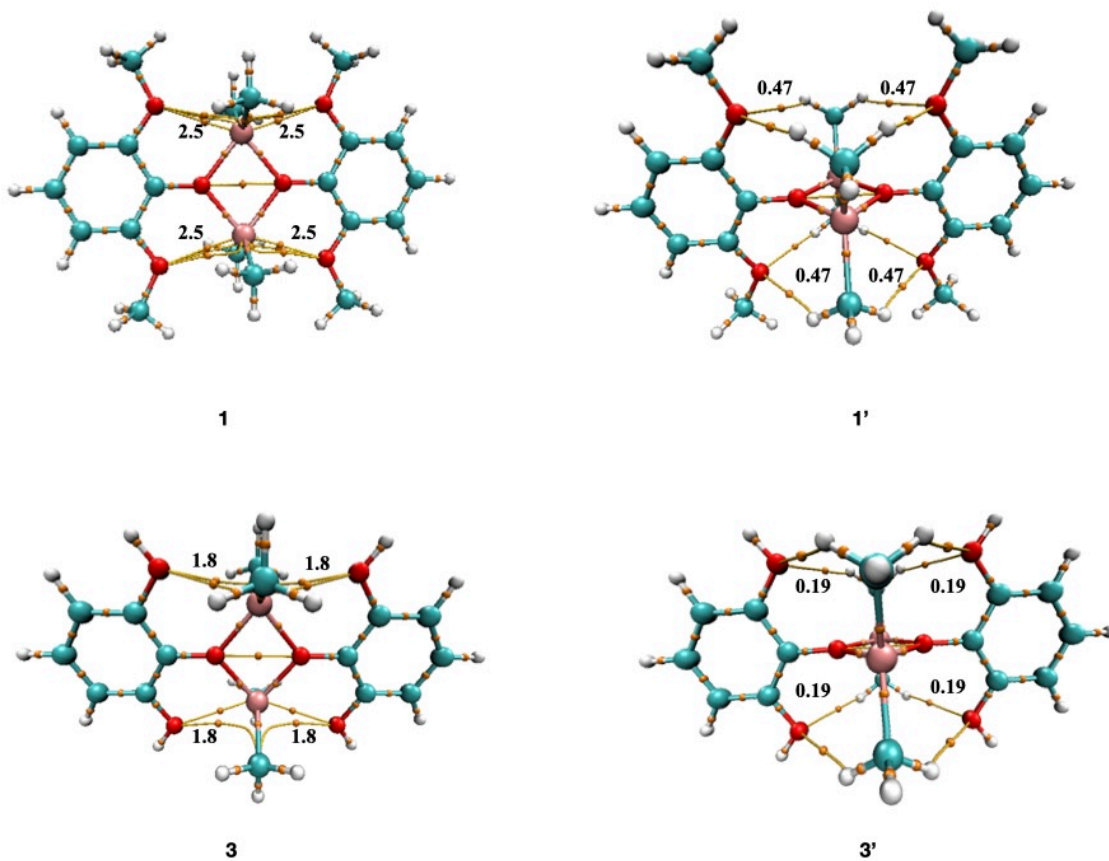

(b) AIM molecular graphs of di-nuclear complexes of Al (4 and 5) and its corresponding rotamer (4' and 5') with  $\rho$  at BCP provided

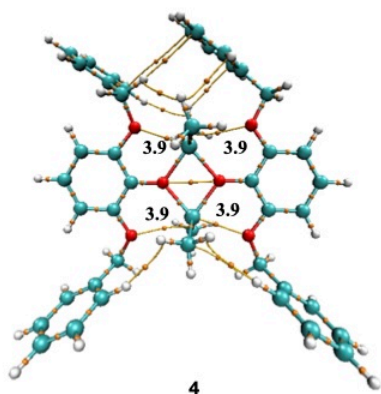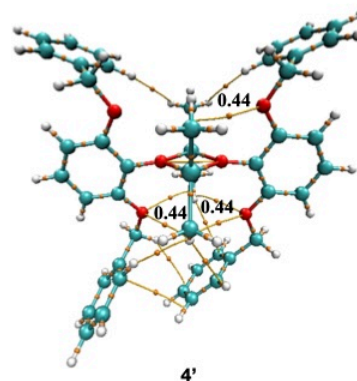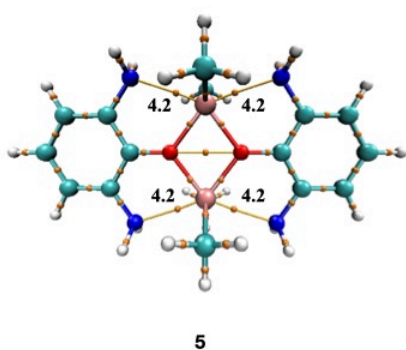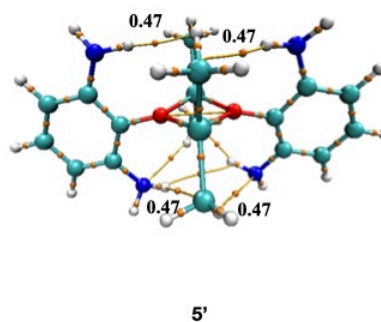

(c) AIM molecular graphs of di-nuclear complexes of Al (6 and 7) and its corresponding rotamer (6' and 7') with  $\rho$  at BCP provided

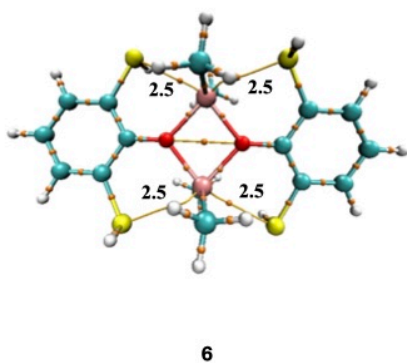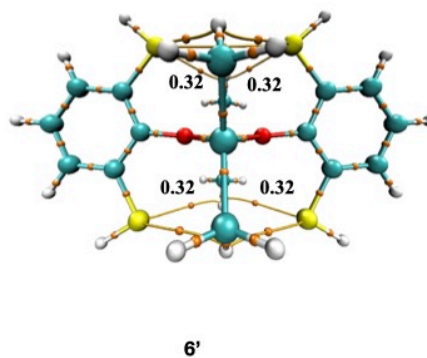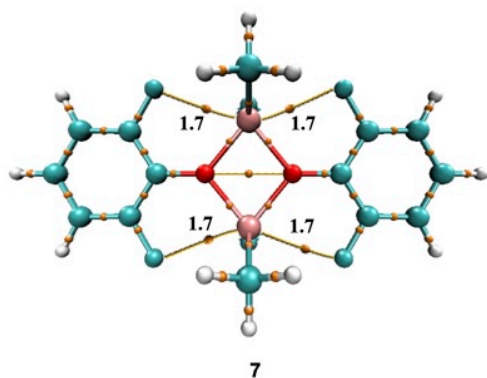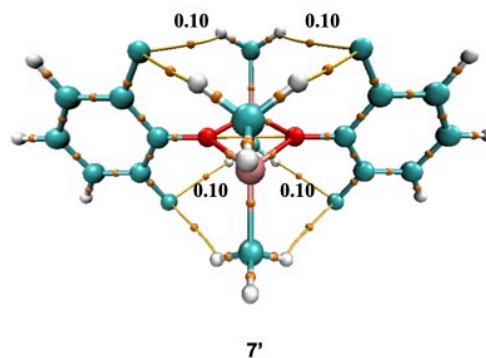

Figure S4 : (a) NCIplot of di-nuclear complexes of Al (**1** and **3**) and its corresponding rotamer (**1'** and **3'**)

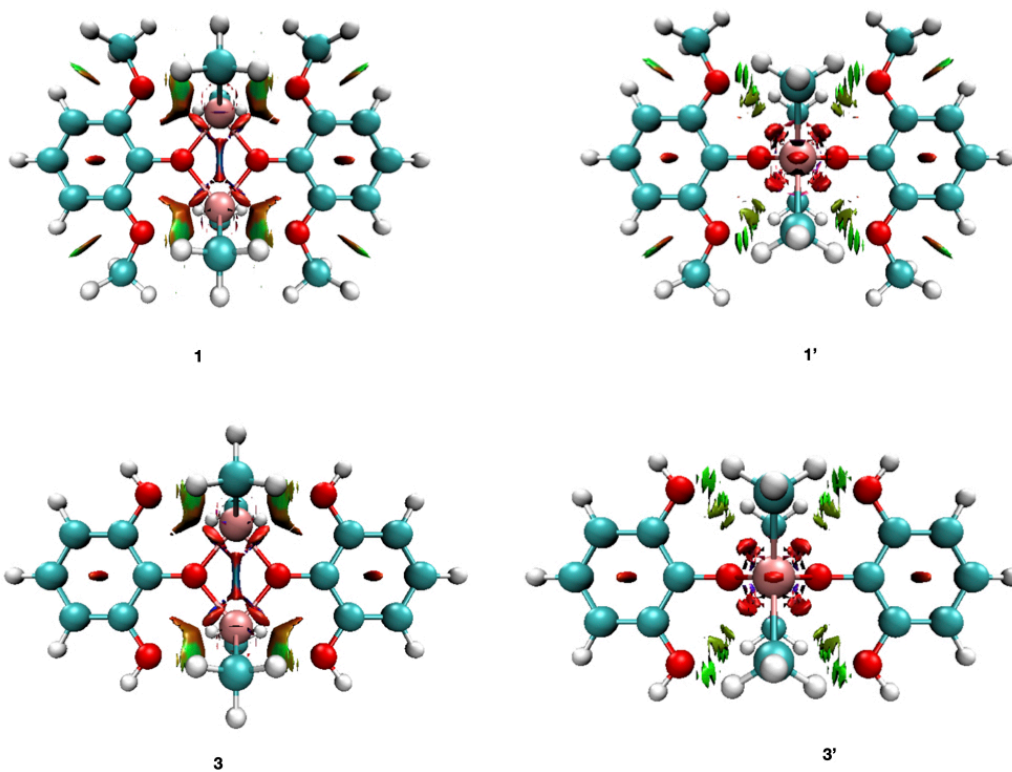

(b) NCIplot of di-nuclear complexes of Al (**4** and **5**) and its corresponding rotamer (**4'** and **5'**)

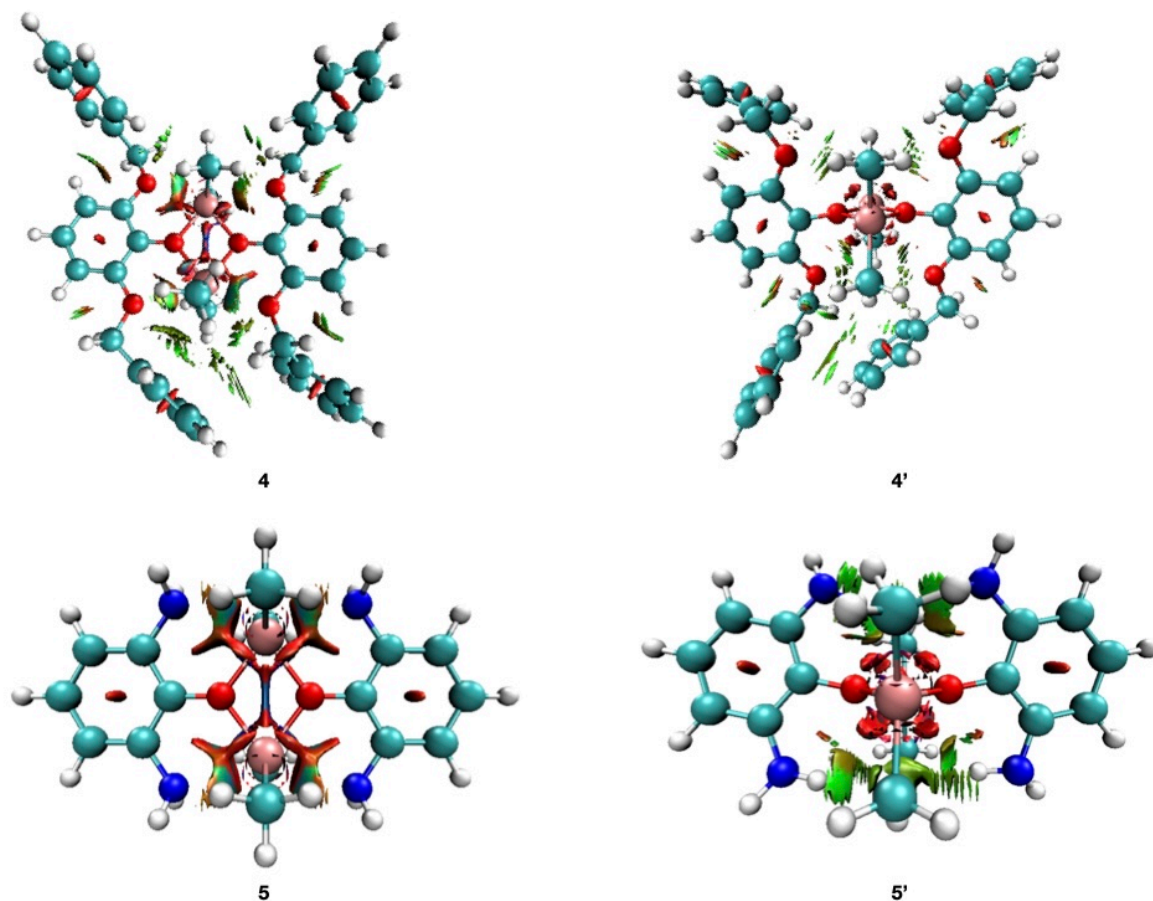

(c) NCIPlot of di-nuclear complexes of Al (6 and 7) and its corresponding rotamer (6' and 7')

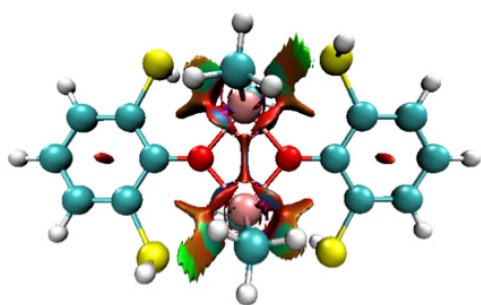

6

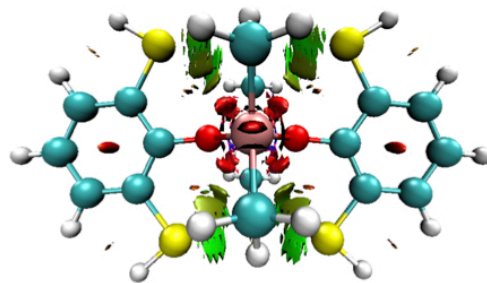

6'

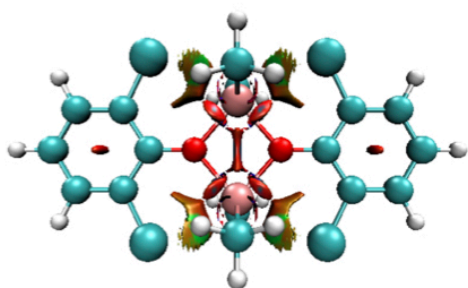

7

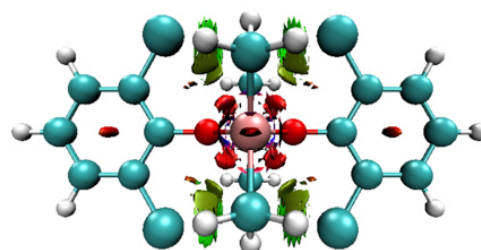

7'



## Reaction Co-ordinates

### [(Al)Me<sub>2</sub>(2,6-(OMe)<sub>2</sub>C<sub>6</sub>H<sub>3</sub>O)]<sub>2</sub> (1)

0,1

|    |               |               |               |
|----|---------------|---------------|---------------|
| C  | 5.3609392876  | 0.000185093   | -0.0003598189 |
| C  | 4.6737932416  | 1.2152587057  | -0.0003285182 |
| C  | 3.2748737016  | 1.2093103902  | -0.0001452677 |
| C  | 2.5588963479  | 0.000152635   | 0.0000191203  |
| C  | 3.2748974675  | -1.2089846366 | -0.0000462515 |
| C  | 4.6738182383  | -1.2149024914 | -0.000231233  |
| H  | 6.4514500135  | 0.0001968516  | -0.0005126008 |
| H  | 5.2226460894  | 2.1556984192  | -0.0004602953 |
| H  | 5.2226905385  | -2.1553304414 | -0.0002821118 |
| O  | 1.1987369662  | 0.0000855771  | 0.0001922669  |
| O  | 2.4759517037  | 2.3207682743  | -0.0001570796 |
| O  | 2.4759754877  | -2.3204438871 | 0.0000662588  |
| C  | 3.090113037   | -3.6045730065 | -0.000124895  |
| H  | 2.2664930307  | -4.3271166316 | -0.0000461753 |
| H  | 3.707713417   | -3.7494464992 | -0.9014999471 |
| H  | 3.7079965166  | -3.7495775288 | 0.9010347744  |
| C  | 3.0900917242  | 3.6048976788  | -0.0003920026 |
| H  | 3.707720573   | 3.7497227483  | -0.9017548025 |
| H  | 2.2664766091  | 4.3274466136  | -0.0003740498 |
| H  | 3.7079470012  | 3.7499393421  | 0.9007806709  |
| Al | -0.0001102747 | 1.5145160599  | 0.0003399021  |
| Al | 0.0001122542  | -1.5145142945 | 0.0002930718  |
| O  | -1.1987367718 | -0.0000839189 | 0.0004365185  |
| C  | -2.5588959711 | -0.0001515489 | 0.0001817986  |
| C  | -3.274898404  | 1.2089850503  | 0.0000506061  |
| C  | -3.2748722267 | -1.2093099749 | 0.0000006474  |
| C  | -4.6738189696 | 1.2149015515  | -0.0002567742 |
| C  | -4.6737915414 | -1.2152596963 | -0.0003021108 |
| C  | -5.3609388777 | -0.0001867215 | -0.0004202745 |
| H  | -5.22269157   | 2.1553295233  | -0.0003781529 |
| H  | -5.2226428746 | -2.1557004799 | -0.0004549125 |
| H  | -6.4514495505 | -0.0001995759 | -0.0006728674 |
| O  | -2.4759796511 | 2.3204462645  | 0.0002020471  |
| O  | -2.4759508282 | -2.3207679526 | 0.0001156544  |
| C  | -3.0901232646 | 3.6045723196  | -0.0002347669 |
| H  | -2.2665070047 | 4.3271201902  | -0.0001149649 |
| H  | -3.7075900539 | 3.7493356718  | -0.9017190223 |
| H  | -3.7081421676 | 3.7496800647  | 0.9008154649  |
| C  | -3.0900938712 | -3.6048957691 | -0.0002588857 |
| H  | -3.7080891062 | -3.7499670478 | 0.900812974   |
| H  | -3.7075838942 | -3.7496874049 | -0.9017222829 |
| H  | -2.2664806979 | -4.3274468797 | -0.0001357281 |
| C  | 0.0001340252  | -2.3403339957 | -1.7937426976 |
| H  | 0.8880187824  | -2.0468479213 | -2.3752263705 |

|   |               |               |               |
|---|---------------|---------------|---------------|
| H | -0.0001406511 | -3.4423875083 | -1.743532699  |
| H | -0.8874903551 | -2.0464195418 | -2.3754101105 |
| C | -0.0003867119 | 2.3403949182  | -1.7936674941 |
| H | -0.888143883  | 2.0465815672  | -2.3751839125 |
| H | -0.0005499112 | 3.4424466606  | -1.7434205874 |
| H | 0.8873652628  | 2.0468455655  | -2.3753214388 |
| C | -0.0000705422 | 2.3403684647  | 1.7943630747  |
| C | 0.0003320549  | -2.3404262474 | 1.7942875264  |
| H | -0.8878199304 | 2.0466924015  | 2.3759563669  |
| H | 0.8876929166  | 2.0466586723  | 2.3759190032  |
| H | -0.0000522943 | 3.442421977   | 1.744143666   |
| H | -0.8875692109 | -2.0471007913 | 2.3758239779  |
| H | 0.0007763513  | -3.4424778729 | 1.7440309877  |
| H | 0.8879434223  | -2.0464039853 | 2.3759197236  |

**[(Al)Me<sub>2</sub>(2,6-(OMe)<sub>2</sub>C<sub>6</sub>H<sub>3</sub>O)]<sub>2</sub> (1')**

0,1

|    |           |           |           |
|----|-----------|-----------|-----------|
| C  | 5.367072  | 0.000246  | 0.000011  |
| C  | 4.685303  | 1.216415  | -0.000053 |
| C  | 3.282448  | 1.219284  | -0.000044 |
| C  | 2.576995  | 0.000002  | 0.000014  |
| C  | 3.282654  | -1.219160 | 0.000070  |
| C  | 4.685510  | -1.216038 | 0.000076  |
| H  | 6.458161  | 0.000338  | 0.000010  |
| H  | 5.241282  | 2.152210  | -0.000111 |
| H  | 5.241655  | -2.151735 | 0.000132  |
| O  | 1.200760  | -0.000085 | 0.000011  |
| O  | 2.504988  | 2.339703  | -0.000140 |
| O  | 2.505414  | -2.339740 | 0.000160  |
| C  | 3.163520  | -3.602386 | 0.000292  |
| H  | 2.363478  | -4.351401 | 0.000368  |
| H  | 3.787461  | -3.733103 | -0.899775 |
| H  | 3.787454  | -3.732919 | 0.900390  |
| C  | 3.162829  | 3.602485  | -0.000307 |
| H  | 3.786732  | 3.733126  | -0.900412 |
| H  | 2.362629  | 4.351330  | -0.000397 |
| H  | 3.786751  | 3.733355  | 0.899751  |
| Al | -0.000014 | -0.000012 | 1.467605  |
| Al | 0.000013  | -0.000028 | -1.467601 |
| O  | -1.200760 | 0.000061  | -0.000007 |
| C  | -2.576994 | 0.000001  | -0.000013 |
| C  | -3.282627 | 1.219178  | 0.000033  |
| C  | -3.282473 | -1.219266 | -0.000059 |
| C  | -4.685483 | 1.216086  | 0.000041  |
| C  | -4.685327 | -1.216367 | -0.000068 |
| C  | -5.367071 | -0.000184 | -0.000014 |
| H  | -5.241609 | 2.151794  | 0.000089  |

|   |           |           |           |
|---|-----------|-----------|-----------|
| H | -5.241327 | -2.152150 | -0.000117 |
| H | -6.458160 | -0.000253 | -0.000015 |
| O | -2.505362 | 2.339741  | 0.000119  |
| O | -2.505035 | -2.339700 | -0.000139 |
| C | -3.163440 | 3.602402  | 0.000274  |
| H | -2.363381 | 4.351399  | 0.000357  |
| H | -3.787383 | 3.733147  | -0.899787 |
| H | -3.787365 | 3.732935  | 0.900377  |
| C | -3.162902 | -3.602469 | -0.000265 |
| H | -3.786823 | -3.733298 | 0.899800  |
| H | -3.786811 | -3.733125 | -0.900363 |
| H | -2.362717 | -4.351330 | -0.000334 |
| C | 0.000442  | 1.722478  | -2.419718 |
| H | 0.886334  | 2.317024  | -2.146524 |
| H | -0.002721 | 1.602450  | -3.513810 |
| H | -0.881794 | 2.320161  | -2.141635 |
| C | -0.000009 | 1.722505  | 2.419702  |
| H | -0.883981 | 2.318697  | 2.143907  |
| H | -0.000201 | 1.602487  | 3.513800  |
| H | 0.884157  | 2.318539  | 2.144198  |
| C | -0.000059 | -1.722534 | 2.419692  |
| C | -0.000386 | -1.722560 | -2.419670 |
| H | -0.884521 | -2.318319 | 2.144595  |
| H | 0.883617  | -2.318970 | 2.143483  |
| H | 0.000660  | -1.602524 | 3.513791  |
| H | -0.886097 | -2.317251 | -2.146207 |
| H | 0.002455  | -1.602564 | -3.513767 |
| H | 0.882034  | -2.320081 | -2.141819 |

**[(Al)Me<sub>2</sub>(2,6-(OEt)<sub>2</sub>C<sub>6</sub>H<sub>3</sub>O)]<sub>2</sub> (2)**

0,1

|   |              |               |               |
|---|--------------|---------------|---------------|
| C | 5.3574532501 | 0.0011499239  | -0.0001781435 |
| C | 4.6715609540 | 1.2034210765  | -0.1768159567 |
| C | 3.2721483385 | 1.1994604724  | -0.1784176152 |
| C | 2.5596608658 | 0.0005393836  | -0.0000061201 |
| C | 3.2726857271 | -1.1980777309 | 0.1783154678  |
| C | 4.6721024952 | -1.2014174149 | 0.1765394209  |
| H | 6.4480566175 | 0.0013856306  | -0.0002444035 |
| H | 5.2249482343 | 2.1311975831  | -0.3103418422 |
| H | 5.2259087919 | -2.1289540747 | 0.3099902955  |
| O | 1.1986996177 | 0.0002586681  | 0.0000697202  |
| O | 2.4657427967 | 2.2909781525  | -0.3603845912 |
| O | 2.4667877739 | -2.2899464841 | 0.3603660183  |
| C | 3.0478894949 | -3.5964192429 | 0.5053995605  |
| H | 2.2538753232 | -4.1866800256 | 0.9836434734  |
| H | 3.8948761600 | -3.5460564022 | 1.2097518070  |
| C | 3.0462633104 | 3.5977122635  | -0.5054400428 |

|    |               |               |               |
|----|---------------|---------------|---------------|
| H  | 3.8931486888  | 3.5477387854  | -1.2099406845 |
| H  | 2.2519203971  | 4.1876649772  | -0.9835176884 |
| Al | -0.0000761365 | 1.4974090492  | -0.2176255346 |
| Al | 0.0004421546  | -1.4973535367 | 0.2177906339  |
| O  | -1.1983825851 | -0.0001916146 | 0.0001989465  |
| C  | -2.5593523922 | -0.0005029525 | 0.0000472897  |
| C  | -3.2724072000 | 1.1984157346  | -0.1762001561 |
| C  | -3.2718655046 | -1.1997619383 | 0.1761528504  |
| C  | -4.6718257874 | 1.2017042159  | -0.1746933363 |
| C  | -4.6712796025 | -1.2037446731 | 0.1743402218  |
| C  | -5.3571815906 | -0.0011865097 | -0.0002542443 |
| H  | -5.2256238068 | 2.1294719462  | -0.3065749168 |
| H  | -5.2246573960 | -2.1317811020 | 0.3060997654  |
| H  | -6.4477850605 | -0.0014518644 | -0.0003766284 |
| O  | -2.4665819750 | 2.2907027690  | -0.3560395698 |
| O  | -2.4655327036 | -2.2916515510 | 0.3561821582  |
| C  | -3.0478196132 | 3.5974393969  | -0.4980978490 |
| H  | -2.2536004929 | 4.1891122911  | -0.9742485134 |
| H  | -3.8943111659 | 3.5487504034  | -1.2031654546 |
| C  | -3.0461683894 | -3.5986617313 | 0.4982338666  |
| H  | -3.8928052349 | -3.5503110257 | 1.2031494311  |
| H  | -2.2517518439 | -4.1899191828 | 0.9745711766  |
| C  | 0.0017162030  | -2.5572700952 | -1.4527863362 |
| H  | 0.8892655801  | -2.3450390963 | -2.0690321548 |
| H  | 0.0012285751  | -3.6421990021 | -1.2503691417 |
| H  | -0.8846620993 | -2.3445313509 | -2.0705378360 |
| C  | -0.0015966338 | 2.0661406454  | -2.1089718250 |
| H  | -0.8905878649 | 1.6954731258  | -2.6423255089 |
| H  | -0.0020021336 | 3.1647433694  | -2.2122915095 |
| H  | 0.8867869825  | 1.6959424080  | -2.6436636240 |
| C  | 0.0006619416  | 2.5574785956  | 1.4528546124  |
| C  | -0.0004215825 | -2.0662912062 | 2.1090738556  |
| H  | -0.8857356316 | 2.3445309688  | 2.0705036528  |
| H  | 0.8881916343  | 2.3455693274  | 2.0692410198  |
| H  | -0.0001236284 | 3.6423888842  | 1.2503357831  |
| H  | -0.8899059167 | -1.6968919609 | 2.6424811558  |
| H  | 0.0006894289  | -3.1649062835 | 2.2122602979  |
| H  | 0.8874686974  | -1.6949560528 | 2.6437994224  |
| C  | -3.4476681288 | -4.2048196779 | -0.8371229947 |
| C  | 3.4488249510  | -4.2058361169 | -0.8286411358 |
| C  | 3.4471801669  | 4.2072222140  | 0.8285627597  |
| C  | -3.4498290954 | 4.2033021929  | 0.8372413036  |
| H  | -4.2186737203 | 3.6013297174  | 1.3401111324  |
| H  | -2.5786070379 | 4.2753720121  | 1.5018412220  |
| H  | -3.8535958444 | 5.2144121113  | 0.6791334760  |
| H  | 2.5756266585  | 4.2801101505  | 1.4926349599  |
| H  | 4.2163801460  | 3.6072373433  | 1.3332599782  |
| H  | 3.8500633535  | 5.2183157144  | 0.6681134792  |

|   |               |               |               |
|---|---------------|---------------|---------------|
| H | -4.2167114546 | -3.6032512033 | -1.3401714492 |
| H | -2.5763072483 | -4.2765384922 | -1.5015777548 |
| H | -3.8509890364 | -5.2161043410 | -0.6789947219 |
| H | 2.5771883724  | -4.2790865930 | -1.4925655195 |
| H | 4.2177095271  | -3.6055787030 | -1.3334950946 |
| H | 3.8521223276  | -5.2167682707 | -0.6682153161 |

**[(Al)Me<sub>2</sub>(2,6-(OEt)<sub>2</sub>C<sub>6</sub>H<sub>3</sub>O)]<sub>2</sub> (2')**

0,1

|    |               |               |               |
|----|---------------|---------------|---------------|
| C  | 5.3640743092  | 0.0014554344  | 0.0003028323  |
| C  | 4.684744605   | -1.1923494436 | 0.2368905679  |
| C  | 3.281520162   | -1.1980469464 | 0.2420787814  |
| C  | 2.5784621314  | -0.0001396128 | 0.0002706837  |
| C  | 3.2801552894  | 1.1985717769  | -0.2415459732 |
| C  | 4.6833858922  | 1.1944831469  | -0.2363138896 |
| H  | 6.4552771734  | 0.0020810385  | 0.0003267446  |
| H  | 5.2457294308  | -2.1077505425 | 0.4144332403  |
| H  | 5.2433423963  | 2.1105203803  | -0.4138360088 |
| O  | 1.2008534683  | -0.0009093561 | 0.0002525876  |
| O  | 2.4969147586  | -2.2873821512 | 0.4827499617  |
| O  | 2.4942954901  | 2.2869808598  | -0.4822645456 |
| C  | 3.1121531303  | 3.5675567856  | -0.6834006139 |
| H  | 2.3407680886  | 4.1527439423  | -1.2039258284 |
| H  | 3.9725978647  | 3.4724687549  | -1.3674174792 |
| C  | 3.1162360675  | -3.5674454445 | 0.6826748847  |
| H  | 3.9765892503  | -3.4720488689 | 1.3667650299  |
| H  | 2.345527326   | -4.1539957095 | 1.2026625611  |
| Al | -0.0001392726 | 0.2544164756  | 1.443908041   |
| Al | 0.0001027125  | -0.2563445352 | -1.4435749904 |
| O  | -1.2009054031 | -0.0003960434 | -0.0000285953 |
| C  | -2.5785090821 | 0.0000250816  | -0.0001485327 |
| C  | -3.2812932615 | -1.1978478477 | 0.2426519502  |
| C  | -3.2804656663 | 1.1983672837  | -0.2430102796 |
| C  | -4.6845201115 | -1.1924872937 | 0.2373653403  |
| C  | -4.6836940431 | 1.1939626092  | -0.2378097227 |
| C  | -5.3641128122 | 0.0009698951  | -0.0002356769 |
| H  | -5.2453120622 | -2.1078707653 | 0.4156100106  |
| H  | -5.2438590309 | 2.1097253074  | -0.4160906985 |
| H  | -6.4553157459 | 0.0013423722  | -0.0002648349 |
| O  | -2.4964070921 | -2.2867632785 | 0.4842517429  |
| O  | -2.4948419379 | 2.2867738916  | -0.4845653258 |
| C  | -3.1153596896 | -3.5666980607 | 0.6860998809  |
| H  | -2.3445325982 | -4.1522179825 | 1.2070784219  |
| H  | -3.9758166068 | -3.4704951679 | 1.3699426231  |
| C  | -3.112956787  | 3.5671789704  | -0.6859979149 |
| H  | -3.9734848962 | 3.4717623226  | -1.3698611311 |
| H  | -2.3417539849 | 4.1523558231  | -1.2068080121 |

|   |               |               |               |
|---|---------------|---------------|---------------|
| C | 0.001617747   | 1.2609414267  | -2.6946703225 |
| H | 0.8884372001  | 1.8926853204  | -2.5309287925 |
| H | -0.0007553131 | 0.9441103205  | -3.7486811227 |
| H | -0.8817773584 | 1.8967222111  | -2.5281183777 |
| C | -0.0004997786 | 2.1190344806  | 2.0757841322  |
| H | -0.8845788202 | 2.6540679255  | 1.6962095211  |
| H | -0.0008366667 | 2.1970369521  | 3.1735990968  |
| H | 0.8836778501  | 2.6542651837  | 1.6967373819  |
| C | 0.0001256088  | -1.2635178444 | 2.6942212482  |
| C | -0.001725901  | -2.1213109991 | -2.0744414983 |
| H | -0.8851924645 | -1.8970203851 | 2.5291984893  |
| H | 0.8850411301  | -1.897379464  | 2.5283665393  |
| H | 0.0006791031  | -0.9472022267 | 3.7483910076  |
| H | -0.889718203  | -2.6534543107 | -1.699937849  |
| H | 0.0041728602  | -2.1999403143 | -3.1721973502 |
| H | 0.8785049322  | -2.6589996808 | -1.6897551603 |
| C | -3.5007441025 | 4.2378451919  | 0.623489697   |
| C | 3.5000231186  | 4.2379365107  | 0.6262130755  |
| C | 3.5048477131  | -4.2361263971 | -0.6275916755 |
| C | -3.5036009398 | -4.2375215981 | -0.6231712046 |
| H | -4.250005014  | -3.6498920156 | -1.174696362  |
| H | -2.6210373398 | -4.3616436834 | -1.2657013505 |
| H | -3.9287312952 | -5.2321165287 | -0.4220483005 |
| H | 2.6224368723  | -4.3594756693 | -1.2704829058 |
| H | 4.2511729849  | -3.6474327536 | -1.1780845532 |
| H | 3.9302114727  | -5.2309208457 | -0.4279564071 |
| H | -4.2475405886 | 3.6505352776  | 1.1748216613  |
| H | -2.6181100422 | 4.3611616118  | 1.2660794769  |
| H | -3.9252067729 | 5.2327900757  | 0.422688254   |
| H | 2.617458184   | 4.3610024016  | 1.268944353   |
| H | 4.2469534421  | 3.6505834176  | 1.1773157923  |
| H | 3.9243429189  | 5.2329813078  | 0.4256016734  |

**[(Al)Me<sub>2</sub>(2,6-(OH)<sub>2</sub>C<sub>6</sub>H<sub>3</sub>O)]<sub>2</sub> (3)**

0,1

|   |               |               |               |
|---|---------------|---------------|---------------|
| C | -5.3874897087 | 0.0000098496  | -0.0010479766 |
| C | -4.6921114715 | -1.209161252  | -0.0010022308 |
| C | -3.2952872192 | -1.2032208651 | -0.0004660998 |
| C | -2.5709550397 | -0.0000188517 | 0.0000226305  |
| C | -3.2952579303 | 1.2031973649  | -0.0000468985 |
| C | -4.6920830527 | 1.209164248   | -0.0005727171 |
| H | -6.4776458173 | 0.0000224258  | -0.0014751597 |
| H | -5.2273285223 | -2.1616544186 | -0.0013965027 |
| H | -5.2272785422 | 2.161669443   | -0.0005981563 |
| O | -1.2096132507 | -0.0000131256 | 0.0004559818  |
| O | -2.5304778502 | -2.3422655781 | -0.0004828223 |
| O | -2.5304198754 | 2.3422224874  | 0.0004730114  |

|    |               |               |               |
|----|---------------|---------------|---------------|
| Al | 0.0000173357  | -1.5090666825 | 0.0006094463  |
| Al | -0.0000165838 | 1.5090663718  | 0.0005550693  |
| O  | 1.2096139731  | 0.0000132331  | 0.0009155371  |
| C  | 2.5709555718  | 0.0000187836  | 0.0003809375  |
| C  | 3.2952583388  | -1.2031974108 | 0.000062131   |
| C  | 3.2952874434  | 1.2032208945  | -0.0000283467 |
| C  | 4.6920832781  | -1.2091642403 | -0.0008141902 |
| C  | 4.6921115542  | 1.2091613193  | -0.0008988321 |
| C  | 5.3874898117  | -0.0000097108 | -0.001322932  |
| H  | 5.2272786653  | -2.1616694719 | -0.0010610255 |
| H  | 5.2273284229  | 2.1616546306  | -0.0012132671 |
| H  | 6.4776457786  | -0.0000221544 | -0.0020291801 |
| O  | 2.5304203416  | -2.3422226852 | 0.0006457494  |
| O  | 2.5304781503  | 2.3422656268  | 0.0004886405  |
| C  | 0.0001439119  | 2.3202938226  | -1.7956037872 |
| H  | -0.8878464475 | 2.0227505955  | -2.3747150074 |
| H  | 0.0005294784  | 3.4214876824  | -1.7460396273 |
| H  | 0.8878681901  | 2.0221375787  | -2.3748126982 |
| C  | 0.000359264   | -2.3203652355 | -1.7955141711 |
| H  | 0.8882828429  | -2.0224661548 | -2.3745493104 |
| H  | 0.000434289   | -3.4215571225 | -1.7459078591 |
| H  | -0.887431815  | -2.0226075939 | -2.3748223192 |
| C  | -0.0002237583 | -2.3206049087 | 1.7966124461  |
| C  | -0.0002774353 | 2.3206767217  | 1.7965222639  |
| H  | 0.887613483   | -2.0229421421 | 2.3758932417  |
| H  | -0.8881161605 | -2.0227626296 | 2.3757179649  |
| H  | -0.0003238907 | -3.4217893478 | 1.7468635936  |
| H  | 0.8876937294  | 2.0232542389  | 2.3757192065  |
| H  | -0.0006650004 | 3.421859008   | 1.7467308552  |
| H  | -0.888035778  | 2.0226372834  | 2.3757348828  |
| H  | -3.1002129739 | 3.1292910044  | 0.0000012797  |
| H  | 3.1002805041  | 3.1293262854  | -0.0010641723 |
| H  | 3.1002120276  | -3.1292906446 | -0.0010035516 |
| H  | -3.1002812624 | -3.1293266727 | -0.0011971067 |

**[(Al)Me<sub>2</sub>(2,6-(OH)<sub>2</sub>C<sub>6</sub>H<sub>3</sub>O)]<sub>2</sub> (3')**

0,1

|   |              |               |               |
|---|--------------|---------------|---------------|
| C | 5.3812023871 | 0.0000302715  | -0.0000069865 |
| C | 4.6905365649 | -1.2103549182 | -0.000176526  |
| C | 3.2900419366 | -1.2124826483 | -0.0001582788 |
| C | 2.5770377227 | -0.0000088366 | -0.0000022919 |
| C | 3.2900098293 | 1.2124842215  | 0.0001513946  |
| C | 4.6905043072 | 1.2103970617  | 0.0001649257  |
| H | 6.4718733354 | 0.000044515   | -0.0000088381 |
| H | 5.2306328144 | -2.1603293488 | -0.0003300897 |
| H | 5.2305742099 | 2.1603863732  | 0.0003167475  |
| O | 1.201929257  | -0.0000187434 | -0.0000008253 |
| O | 2.5485653471 | -2.3614558733 | -0.0003982333 |

|    |               |               |               |
|----|---------------|---------------|---------------|
| O  | 2.5484927274  | 2.3614287988  | 0.0003930776  |
| Al | 0.0000006731  | -0.0000183341 | 1.4712846876  |
| Al | -0.0000002835 | -0.0000156414 | -1.4712846259 |
| O  | -1.2019284193 | 0.000000113   | 0.000000885   |
| C  | -2.57703685   | 0.0000159185  | 0.0000018811  |
| C  | -3.2900178757 | 1.2125032944  | -0.0001525264 |
| C  | -3.2900318697 | -1.2124636425 | 0.0001581066  |
| C  | -4.6905125535 | 1.2104021127  | -0.000167152  |
| C  | -4.6905263112 | -1.2103499658 | 0.0001762444  |
| C  | -5.3812013364 | 0.0000300208  | 0.0000053857  |
| H  | -5.2305908072 | 2.1603867719  | -0.0003203282 |
| H  | -5.2306142708 | -2.160329066  | 0.0003309736  |
| H  | -6.4718722875 | 0.0000365364  | 0.000006788   |
| O  | -2.5485191484 | 2.3614620949  | -0.0003968633 |
| O  | -2.5485361748 | -2.3614220309 | 0.0004017444  |
| C  | 0.0001036394  | 1.7256726394  | -2.4137943861 |
| H  | 0.8839903654  | 2.3213703033  | -2.1365701243 |
| H  | -0.0009490235 | 1.6087868006  | -3.5082873825 |
| H  | -0.8825858025 | 2.3223831341  | -2.1349441521 |
| C  | 0.0000122304  | 1.7256677818  | 2.4137983984  |
| H  | -0.8832279815 | 2.321911629   | 2.1356981081  |
| H  | -0.0000670603 | 1.6087793877  | 3.5082916226  |
| H  | 0.8833491998  | 2.3218334109  | 2.13582586    |
| C  | -0.000015791  | -1.7257215722 | 2.4137671717  |
| C  | -0.0001024751 | -1.7257164981 | -2.4137714303 |
| H  | -0.8834369679 | -2.3218134195 | 2.135902645   |
| H  | 0.8831407398  | -2.322027654  | 2.1355357797  |
| H  | 0.0002168211  | -1.6088544367 | 3.5082626341  |
| H  | -0.8839481616 | -2.321442803  | -2.1364786797 |
| H  | 0.0008741312  | -1.6088469387 | -3.5082662359 |
| H  | 0.8826286934  | -2.3223890255 | -2.134971513  |
| H  | 3.1588013331  | 3.1191438394  | 0.0005306734  |
| H  | -3.1588587701 | -3.1191257954 | 0.0005425405  |
| H  | -3.1588442772 | 3.1191639738  | -0.0005366462 |
| H  | 3.1589052331  | -3.1191458711 | -0.0005391596 |

**[(Al)Me<sub>2</sub>(2,6-(OPh)<sub>2</sub>C<sub>6</sub>H<sub>3</sub>O)]<sub>2</sub> (4)**

0,1

|   |              |              |               |
|---|--------------|--------------|---------------|
| C | 2.1243560126 | 4.5407868076 | -0.0998576641 |
| C | 0.754046937  | 4.4692713965 | -0.3574647481 |
| C | 0.121504404  | 3.221467473  | -0.3803942943 |
| C | 0.8570311817 | 2.0456825392 | -0.1491586296 |
| C | 2.2358366987 | 2.1475544253 | 0.1046180539  |
| C | 2.8767901813 | 3.387863267  | 0.1326214288  |
| H | 2.6151743067 | 5.5143669716 | -0.0806157964 |
| H | 0.1773217311 | 5.3797660257 | -0.5113498529 |
| H | 3.9498962221 | 3.4503405477 | 0.3073993959  |
| O | 0.2615023245 | 0.8242969915 | -0.1685473342 |



|    |               |               |               |
|----|---------------|---------------|---------------|
| O  | -1.2154911162 | 3.0081680518  | -0.6043757372 |
| O  | 2.8466582239  | 0.9277213826  | 0.2883720607  |
| C  | 4.1376121421  | 0.868380066   | 0.9053276534  |
| H  | 4.1995440335  | -0.1597611788 | 1.2954897858  |
| H  | 4.1689703362  | 1.5572362667  | 1.7667128085  |
| C  | -2.0022489868 | 4.0707539744  | -1.1542943784 |
| H  | -1.4652169127 | 4.5358772319  | -1.9989522413 |
| H  | -2.8866566314 | 3.5567190855  | -1.5615935119 |
| Al | -1.5614508439 | 0.3086537584  | -0.5108454159 |
| Al | 1.1318743973  | -0.8619346392 | 0.1483285411  |
| O  | -0.7078887449 | -1.3798505753 | -0.1667933583 |
| C  | -1.2555610024 | -2.6218826735 | -0.2461287172 |
| C  | -2.6100246497 | -2.7674966646 | -0.5915474028 |
| C  | -0.4921614738 | -3.7800268337 | 0.0032502927  |
| C  | -3.1967730694 | -4.0303156949 | -0.7113759552 |
| C  | -1.0723860394 | -5.0483209794 | -0.1181781162 |
| C  | -2.416811778  | -5.1624238786 | -0.4766512335 |
| H  | -4.2525931931 | -4.1273658635 | -0.9576399016 |
| H  | -0.483657271  | -5.9447858477 | 0.0681510676  |
| H  | -2.8665736906 | -6.1520095601 | -0.5639917297 |
| O  | -3.2567438045 | -1.5683700849 | -0.7843914271 |
| O  | 0.8111690106  | -3.5402561374 | 0.3545012857  |
| C  | -4.5131934873 | -1.5609771264 | -1.4773579361 |
| H  | -4.612726404  | -0.5224071643 | -1.8277725544 |
| H  | -4.4502946206 | -2.2112162696 | -2.366452495  |
| C  | 1.6804976174  | -4.6752481044 | 0.5581411534  |
| H  | 1.7235267701  | -5.2666154456 | -0.3730874226 |
| H  | 1.2644738398  | -5.3096106576 | 1.3596328084  |
| C  | 2.0884728435  | -1.3423698634 | -1.5127593442 |
| H  | 1.9994412135  | -0.5173700316 | -2.2394850394 |
| H  | 3.1612263043  | -1.5222483462 | -1.3514504877 |
| H  | 1.6701711766  | -2.2419988642 | -1.9896612797 |
| C  | -1.8867496507 | 0.5875323846  | -2.4414628466 |
| H  | -1.8660593163 | -0.3607985344 | -3.0017967957 |
| H  | -2.8616916044 | 1.0606905998  | -2.6469493095 |
| H  | -1.1174849896 | 1.2418559903  | -2.8806566649 |
| C  | -2.6300002126 | 0.7988008077  | 1.0755343143  |
| C  | 1.4358129254  | -1.0224957173 | 2.0926586909  |
| H  | -2.8615714033 | -0.0893379199 | 1.684584654   |
| H  | -2.0737963536 | 1.4942721541  | 1.7234519266  |
| H  | -3.5869166926 | 1.2823608496  | 0.8195283524  |
| H  | 0.7314925973  | -1.7336092998 | 2.5507053417  |
| H  | 2.4479109914  | -1.3687862006 | 2.3499560436  |
| H  | 1.2859172594  | -0.0460905911 | 2.5819295377  |
| C  | -2.4241285286 | 5.1171285374  | -0.1470377739 |
| C  | -2.6919358538 | 4.7687212403  | 1.1823417812  |
| C  | -2.5906181877 | 6.4474960037  | -0.5506216094 |
| C  | -3.1162821321 | 5.7380611054  | 2.0919142226  |

|   |               |               |               |
|---|---------------|---------------|---------------|
| H | -2.5584115999 | 3.7339171384  | 1.5014994403  |
| C | -3.0249675787 | 7.4161018675  | 0.3568711893  |
| H | -2.3720133543 | 6.7299204319  | -1.5842532159 |
| C | -3.28695219   | 7.0632709418  | 1.6825966895  |
| H | -3.3162655792 | 5.4556980848  | 3.1272765817  |
| H | -3.1485061695 | 8.4502194364  | 0.0297815209  |
| H | -3.6184441331 | 7.8199122768  | 2.3959154695  |
| C | -5.6951773271 | -1.9408216608 | -0.6154034415 |
| C | -6.7830924325 | -2.6147199298 | -1.1835314031 |
| C | -5.7397809268 | -1.5918424607 | 0.739787046   |
| C | -7.9042672746 | -2.9296322036 | -0.4127892614 |
| H | -6.7501457642 | -2.9010817152 | -2.2383967169 |
| C | -6.8558581001 | -1.9148816044 | 1.5125356543  |
| H | -4.89083335   | -1.0721747527 | 1.1866293119  |
| C | -7.9421711518 | -2.5814293184 | 0.939129078   |
| H | -8.7451518996 | -3.456862996  | -0.8672740567 |
| H | -6.8774771087 | -1.6427384777 | 2.5694641504  |
| H | -8.8139267149 | -2.8332914842 | 1.5456294417  |
| C | 5.2896747114  | 1.129597288   | -0.0375837645 |
| C | 6.5269739633  | 1.5252423973  | 0.4866469771  |
| C | 5.1636743294  | 0.9344014256  | -1.417388661  |
| C | 7.6257453796  | 1.7149722721  | -0.3532050092 |
| H | 6.6300842124  | 1.6905493287  | 1.5627263005  |
| C | 6.2605321463  | 1.1327915819  | -2.2583304502 |
| H | 4.2006104279  | 0.6306534875  | -1.8290392847 |
| C | 7.494646742   | 1.5196625346  | -1.7305170439 |
| H | 8.5838183609  | 2.0255732416  | 0.0678979673  |
| H | 6.1483542878  | 0.9839949722  | -3.3339856496 |
| H | 8.3501309697  | 1.6750290727  | -2.3902012498 |
| C | 3.0416559497  | -4.1626688123 | 0.9365372639  |
| C | 3.3782769525  | -3.9679612815 | 2.2817749127  |
| C | 3.9726001332  | -3.82400948   | -0.0537166341 |
| C | 4.6157130932  | -3.4255569994 | 2.63205668    |
| H | 2.653919899   | -4.2228231193 | 3.058590209   |
| C | 5.2074530787  | -3.2731638335 | 0.2912730122  |
| H | 3.7151327444  | -3.971981969  | -1.1041856648 |
| C | 5.5287971499  | -3.0687759309 | 1.6359896779  |
| H | 4.8634049555  | -3.2715473968 | 3.6837412179  |
| H | 5.9169345479  | -2.9944224705 | -0.4898329657 |
| H | 6.4934665908  | -2.6350290702 | 1.9064134853  |

**[(Al)Me<sub>2</sub>(2,6-(OPh)<sub>2</sub>C<sub>6</sub>H<sub>3</sub>O)]<sub>2</sub> (4')**

0,1

0,1

|   |              |              |               |
|---|--------------|--------------|---------------|
| C | 2.9307459626 | 4.0607245695 | -0.0410675811 |
| C | 3.374752124  | 2.7916761251 | 0.3296101486  |
| C | 2.4886704884 | 1.7086825242 | 0.2518165422  |
| C | 1.1714199473 | 1.9118653346 | -0.1991626728 |

|    |               |               |               |
|----|---------------|---------------|---------------|
| C  | 0.7439812733  | 3.195354378   | -0.5849744491 |
| C  | 1.6301354731  | 4.2781519213  | -0.49576965   |
| H  | 3.6188662295  | 4.9049275368  | 0.0238186603  |
| H  | 4.404305745   | 2.6419705558  | 0.6500627388  |
| H  | 1.305571524   | 5.2834693462  | -0.7558907825 |
| O  | 0.2995992507  | 0.847101271   | -0.2662177719 |
| O  | 2.7843820884  | 0.4171786883  | 0.5812268984  |
| O  | -0.545543569  | 3.2580057148  | -1.0341438686 |
| C  | -1.0589816449 | 4.5260825902  | -1.4533714336 |
| H  | -1.9805190302 | 4.2639012941  | -1.9959852921 |
| H  | -0.3733265474 | 5.0032613837  | -2.1756053284 |
| C  | 4.0299093346  | 0.1425941501  | 1.2204265571  |
| H  | 4.2108165329  | 0.865100417   | 2.0361370326  |
| H  | 3.8804484434  | -0.8480310437 | 1.678830811   |
| Al | -0.1576310662 | -0.2206464951 | -1.7557588526 |
| Al | -0.6243163994 | -0.0514794743 | 1.1146559358  |
| O  | -1.0117918774 | -1.1649670751 | -0.3598707632 |
| C  | -1.6943344286 | -2.3597743927 | -0.3917760093 |
| C  | -3.0550035494 | -2.3819515981 | -0.7474803155 |
| C  | -1.021726367  | -3.556769291  | -0.0786688032 |
| C  | -3.7508803922 | -3.5999853988 | -0.7615937795 |
| C  | -1.7215066353 | -4.7720393842 | -0.0967748529 |
| C  | -3.0755348946 | -4.7748534133 | -0.4345308603 |
| H  | -4.8130064034 | -3.6283817603 | -0.9962803727 |
| H  | -1.2215277208 | -5.7058966709 | 0.15320019    |
| H  | -3.6211152133 | -5.7197338715 | -0.4377572986 |
| O  | -3.5822095097 | -1.1629666939 | -1.0674061687 |
| O  | 0.3015051112  | -3.4117282065 | 0.2180153907  |
| C  | -4.9204038051 | -1.1119833415 | -1.5737086485 |
| H  | -4.9803317163 | -0.1184712769 | -2.0447871774 |
| H  | -5.0606216667 | -1.8659379609 | -2.3680162266 |
| C  | 1.0481294103  | -4.5951815265 | 0.5513257707  |
| H  | 0.9839249925  | -5.3162832778 | -0.2834157418 |
| H  | 0.6176004701  | -5.0649325529 | 1.4528509697  |
| C  | 0.5030732626  | -0.9046164347 | 2.4741597662  |
| H  | 1.3255490082  | -1.4702549925 | 2.0165673334  |
| H  | 0.9409678008  | -0.1566495425 | 3.1552901219  |
| H  | -0.0826987114 | -1.601192012  | 3.0964077281  |
| C  | 1.4077067982  | -1.1931184678 | -2.4362852975 |
| H  | 1.1110966777  | -2.0568910546 | -3.0536077377 |
| H  | 2.0421387766  | -0.5528205615 | -3.0710899293 |
| H  | 2.0219208633  | -1.5706095236 | -1.6058056304 |
| C  | -1.4516361848 | 0.654555346   | -2.9443728945 |
| C  | -2.2112616637 | 0.9864854717  | 1.6420605328  |
| H  | -2.2443163783 | 1.1475764555  | -2.361923874  |
| H  | -0.9713139812 | 1.4213290097  | -3.5732397011 |
| H  | -1.9343812321 | -0.0680909265 | -3.6221933598 |
| H  | -2.9198368071 | 0.3663911993  | 2.2155583086  |

|   |               |               |               |
|---|---------------|---------------|---------------|
| H | -1.9404196872 | 1.8334418693  | 2.2938649325  |
| H | -2.7450439239 | 1.3882893955  | 0.7670889207  |
| C | 5.2155283647  | 0.0833517677  | 0.2837508227  |
| C | 5.0496474313  | -0.1175673745 | -1.0904538572 |
| C | 6.5111618169  | 0.1596342805  | 0.8103006601  |
| C | 6.1632078282  | -0.2449871866 | -1.9231787456 |
| H | 4.0424740624  | -0.1810571629 | -1.5040156286 |
| C | 7.6250546135  | 0.0227946335  | -0.0199258054 |
| H | 6.6496296939  | 0.3244774309  | 1.8826147045  |
| C | 7.4536550761  | -0.181221937  | -1.3918495161 |
| H | 6.0195458022  | -0.398493753  | -2.9945680377 |
| H | 8.6293585875  | 0.0833839925  | 0.4039146224  |
| H | 8.3227944781  | -0.2825989    | -2.0441946419 |
| C | -5.9865945327 | -1.2512466071 | -0.5101056304 |
| C | -7.1872631031 | -1.9107835998 | -0.7973327104 |
| C | -5.8034670898 | -0.688780053  | 0.7593320939  |
| C | -8.1950602834 | -2.0035614251 | 0.1652601251  |
| H | -7.3334200733 | -2.3611525089 | -1.7831681221 |
| C | -6.8062532817 | -0.7879814739 | 1.7243787472  |
| H | -4.8658631789 | -0.1793204014 | 0.9886075266  |
| C | -8.0054837957 | -1.4430742073 | 1.4302293236  |
| H | -9.1258750829 | -2.5228793716 | -0.0705105967 |
| H | -6.6504152964 | -0.3497104073 | 2.7120457425  |
| H | -8.7884309653 | -1.5203463524 | 2.1867610746  |
| C | -1.3717857798 | 5.465498028   | -0.3098841672 |
| C | -1.2240286322 | 6.8481078     | -0.4696532807 |
| C | -1.8451371461 | 4.9657933263  | 0.9096110744  |
| C | -1.5489523204 | 7.721896189   | 0.5703424798  |
| H | -0.8447534836 | 7.2452511027  | -1.4154495425 |
| C | -2.1612887578 | 5.8372477826  | 1.9522140529  |
| H | -1.9556019353 | 3.8878130159  | 1.039446276   |
| C | -2.0162690396 | 7.2174057868  | 1.7858765797  |
| H | -1.4267562352 | 8.7981116692  | 0.4341145838  |
| H | -2.5243936905 | 5.4355303297  | 2.9001805316  |
| H | -2.262764457  | 7.8977523862  | 2.6029712593  |
| C | 2.4750503105  | -4.1883863758 | 0.7920159847  |
| C | 2.9719849316  | -4.0587760083 | 2.0936883907  |
| C | 3.3211768971  | -3.9118643894 | -0.2911296867 |
| C | 4.2965131243  | -3.6697836811 | 2.3116907645  |
| H | 2.3135413854  | -4.2566670831 | 2.9425933684  |
| C | 4.6415333118  | -3.5171467874 | -0.0773972296 |
| H | 2.9339115223  | -3.9964427846 | -1.3089928019 |
| C | 5.1332545193  | -3.400534223  | 1.2262693479  |
| H | 4.6736048934  | -3.5742080671 | 3.3316837864  |
| H | 5.2880753096  | -3.2878628161 | -0.9255642784 |
| H | 6.1654626194  | -3.0868089102 | 1.3912411909  |

**[(Al)Me<sub>2</sub>(2,6-(NH<sub>2</sub>)<sub>2</sub>C<sub>6</sub>H<sub>3</sub>O)]<sub>2</sub> (5)**

0,1

|    |               |               |               |
|----|---------------|---------------|---------------|
| C  | 5.3165026172  | 0.0002685229  | 0.0005741162  |
| C  | 4.6129197808  | 1.2074140034  | 0.0016861668  |
| C  | 3.217143874   | 1.2191162267  | 0.0014215162  |
| C  | 2.5087906596  | -0.0000121187 | -0.0001427828 |
| C  | 3.2173693301  | -1.219014156  | -0.0012677936 |
| C  | 4.6131488784  | -1.2070099375 | -0.0008478634 |
| H  | 6.4070009786  | 0.000372082   | 0.0008345004  |
| H  | 5.1501120184  | 2.1590174421  | 0.002884021   |
| H  | 5.1505287736  | -2.1585080565 | -0.0017401349 |
| O  | 1.1705818361  | -0.0000704176 | -0.0005381701 |
| Al | 0.0000919069  | 1.5631231647  | -0.0004544047 |
| Al | -0.0000857795 | -1.5631977765 | -0.0005015773 |
| O  | -1.1705827537 | 0.0000033483  | -0.0011915833 |
| C  | -2.5087962122 | -0.000006707  | -0.000430326  |
| C  | -3.2172809721 | 1.2190511067  | -0.00117351   |
| C  | -3.2172607028 | -1.2190795352 | 0.0012763975  |
| C  | -4.6130605104 | 1.2071658673  | 0.0002424894  |
| C  | -4.6130354526 | -1.2072544707 | 0.002561799   |
| C  | -5.3165157459 | -0.0000504572 | 0.0021828528  |
| H  | -5.1503598089 | 2.1587096096  | -0.0002664108 |
| H  | -5.1503110487 | -2.1588107488 | 0.0039603414  |
| H  | -6.4070134858 | -0.0000612534 | 0.0032847663  |
| C  | -0.0011995175 | -2.2692227922 | -1.861598674  |
| H  | 0.8811560571  | -1.9366334197 | -2.4336678092 |
| H  | -0.0003630663 | -3.3735050511 | -1.8857739189 |
| H  | -0.8851830003 | -1.9380235584 | -2.4319411323 |
| C  | 0.0016869537  | 2.2693425107  | -1.8614562714 |
| H  | -0.880497541  | 1.9368597139  | -2.4338537214 |
| H  | 0.0009212049  | 3.3736275447  | -1.8854700418 |
| H  | 0.8858538636  | 1.9382006377  | -2.4315389666 |
| C  | -0.0019007001 | 2.268371473   | 1.8609003323  |
| C  | 0.0014850036  | -2.2686352222 | 1.8607770934  |
| H  | -0.8861567811 | 1.9368885092  | 2.4306386309  |
| H  | 0.8802184589  | 1.9356567378  | 2.433269213   |
| H  | -0.0012094744 | 3.3726444162  | 1.8854782284  |
| H  | -0.8808374846 | -1.9360404565 | 2.4328941791  |
| H  | 0.0008050721  | -3.3729117378 | 1.8851953291  |
| H  | 0.8855484451  | -1.9371990333 | 2.4308474632  |
| N  | 2.4085865446  | 2.4125348641  | 0.0025979086  |
| H  | 2.5837733808  | 2.9847699259  | 0.8311249948  |
| H  | 2.5874894707  | 2.9888934236  | -0.8222507612 |
| N  | -2.4089108057 | 2.4125792878  | -0.0030658244 |
| H  | -2.5839452371 | 2.9841553552  | -0.8320820915 |
| H  | -2.5881194116 | 2.9895383621  | 0.821289367   |
| N  | -2.4088373457 | -2.4125859825 | 0.0017422982  |
| H  | -2.5850849873 | -2.9859628182 | 0.8292479003  |
| H  | -2.5868292206 | -2.9877643924 | -0.8241336749 |

|   |              |               |               |
|---|--------------|---------------|---------------|
| N | 2.4090962111 | -2.4126095998 | -0.002684578  |
| H | 2.5847778829 | -2.9849075769 | -0.8310613201 |
| H | 2.5877528431 | -2.9888218597 | 0.8223174371  |

**[(Al)Me<sub>2</sub>(2,6-(NH<sub>2</sub>)<sub>2</sub>C<sub>6</sub>H<sub>3</sub>O)]<sub>2</sub> (5')**

0,1

|    |               |               |               |
|----|---------------|---------------|---------------|
| C  | -5.26467332   | 0.704980552   | 0.0018725279  |
| C  | -4.8725714215 | -0.6301516156 | 0.0563821673  |
| C  | -3.506235757  | -0.9631977471 | 0.0192060266  |
| C  | -2.5658024182 | 0.0797992688  | -0.0643133703 |
| C  | -2.9552799652 | 1.4290278317  | -0.1398502949 |
| C  | -4.3276291483 | 1.7310518071  | -0.1010691677 |
| H  | -6.3273065684 | 0.9520712319  | 0.0321175617  |
| H  | -5.61586177   | -1.4272819221 | 0.1191059645  |
| H  | -4.647459771  | 2.7738023083  | -0.1516852708 |
| O  | -1.2033548755 | -0.2379038604 | -0.0560947509 |
| Al | 0.0614143337  | -0.4057024861 | -1.4470722377 |
| Al | -0.0613882821 | -0.4058026076 | 1.4470740196  |
| O  | 1.203370044   | -0.2378222275 | 0.0561062558  |
| C  | 2.5658020019  | 0.0799509073  | 0.0643442991  |
| C  | 2.9552563696  | 1.42918838    | 0.1399540879  |
| C  | 3.5062533004  | -0.9630184193 | -0.0192501107 |
| C  | 4.327599756   | 1.731239669   | 0.1011767115  |
| C  | 4.8725818066  | -0.6299447124 | -0.0564199289 |
| C  | 5.264660606   | 0.7051912617  | -0.0018323921 |
| H  | 4.647413364   | 2.7739938138  | 0.1518487144  |
| H  | 5.6158851389  | -1.4270580487 | -0.1192025804 |
| H  | 6.3272889433  | 0.9523033148  | -0.0320743345 |
| C  | -0.1143312385 | 1.1393362289  | 2.658329026   |
| H  | -0.575142547  | 2.0266139015  | 2.1955926589  |
| H  | -0.7166155711 | 0.8972196221  | 3.548830208   |
| H  | 0.8870720214  | 1.41827256    | 3.0250279997  |
| C  | 0.1142431674  | 1.1395201479  | -2.6582235065 |
| H  | 0.5749813201  | 2.0268017087  | -2.1954225614 |
| H  | 0.71655117    | 0.8975101123  | -3.548737986  |
| H  | -0.8871795936 | 1.4184033749  | -3.0249105821 |
| C  | 0.1054457173  | -2.2553750088 | -2.1182062272 |
| C  | -0.1052849395 | -2.2555244263 | 2.1180846533  |
| H  | 1.0059297096  | -2.4535769982 | -2.7221972466 |
| H  | 0.0647780979  | -3.0162568535 | -1.3212315234 |
| H  | -0.7619088697 | -2.446303803  | -2.7710400898 |
| H  | -0.0645644411 | -3.0163501407 | 1.3210585006  |
| H  | 0.7620856262  | -2.4464360333 | 2.770902185   |
| H  | -1.0057525662 | -2.4538318307 | 2.7220650992  |
| N  | -3.0778107661 | -2.2866473421 | 0.0023045984  |
| H  | -2.1163910493 | -2.4413130302 | 0.2931512834  |
| H  | -3.7242014208 | -2.953709661  | 0.4114477734  |
| N  | 1.9869534142  | 2.4368936857  | 0.1844447925  |

|   |               |               |               |
|---|---------------|---------------|---------------|
| H | 1.137574472   | 2.1853043766  | 0.6867572982  |
| H | 2.3485017381  | 3.3290112478  | 0.511459198   |
| N | 3.0778425022  | -2.2864744482 | -0.0024363641 |
| H | 2.1164197135  | -2.4411297754 | -0.2932813458 |
| H | 3.7242347001  | -2.9535012633 | -0.4116348615 |
| N | -1.9869800105 | 2.4367410519  | -0.1842738589 |
| H | -1.1375897784 | 2.1851833908  | -0.6865864797 |
| H | -2.3485279452 | 3.3288755058  | -0.511242539  |

**[(Al)Me<sub>2</sub>(2,6-(SH)<sub>2</sub>C<sub>6</sub>H<sub>3</sub>O)]<sub>2</sub> (6)**

0,1

|    |               |               |               |
|----|---------------|---------------|---------------|
| C  | 5.4643420208  | 0.0004748946  | 0.0060016416  |
| C  | 4.7537178853  | 1.1941927339  | 0.0868926536  |
| C  | 3.3555224947  | 1.2061408289  | 0.1024007391  |
| C  | 2.60721885    | 0.0004638502  | 0.0005391782  |
| C  | 3.3559387591  | -1.2051525439 | -0.0990384089 |
| C  | 4.7540450088  | -1.1932366397 | -0.07803437   |
| H  | 6.5544095393  | 0.0004787545  | 0.0081775188  |
| H  | 5.2779104686  | 2.1488546668  | 0.1485039544  |
| H  | 5.2784570628  | -2.1478795779 | -0.1379972664 |
| O  | 1.2634241504  | 0.0002751933  | -0.0016149353 |
| Al | -0.0004206477 | 1.515418152   | -0.0012385851 |
| Al | 0.0003378611  | -1.5155713409 | -0.0014784381 |
| O  | -1.2635035898 | -0.0004712429 | -0.0019000316 |
| C  | -2.6072957639 | -0.0006170897 | 0.0003976972  |
| C  | -3.3560359534 | 1.2050058048  | -0.0989821294 |
| C  | -3.3555676095 | -1.2063109349 | 0.1021745744  |
| C  | -4.754138503  | 1.1930779265  | -0.0777695986 |
| C  | -4.7537667901 | -1.1943725814 | 0.0868931144  |
| C  | -5.4644125786 | -0.0006490248 | 0.006277163   |
| H  | -5.2785681451 | 2.1477202933  | -0.1375839956 |
| H  | -5.2779412722 | -2.1490488452 | 0.1484390126  |
| H  | -6.5544797366 | -0.0006610574 | 0.0086325341  |
| C  | -0.1502681333 | -2.0685391203 | -1.9042057055 |
| H  | 0.6175545335  | -1.560497143  | -2.5116379    |
| H  | -0.0317195828 | -3.1534032652 | -2.0549913252 |
| H  | -1.1275108932 | -1.7895238412 | -2.3321359173 |
| C  | 0.1505534501  | 2.0685109605  | -1.9039133192 |
| H  | -0.6171617874 | 1.5604898366  | -2.5114991297 |
| H  | 0.0320258437  | 3.1533795487  | -2.0546831645 |
| H  | 1.1278713934  | 1.7895140574  | -2.3316885068 |
| C  | -0.1518021743 | 2.0672541944  | 1.9018000683  |
| C  | 0.151295895   | -2.067889811  | 1.9014382626  |
| H  | -1.1287371642 | 1.786884408   | 2.3295758346  |
| H  | 0.6165803514  | 1.5598958366  | 2.5090917876  |
| H  | -0.0345809501 | 3.1521999974  | 2.0530500334  |
| H  | -0.6171832562 | -1.5606716055 | 2.5087244655  |

|   |               |               |               |
|---|---------------|---------------|---------------|
| H | 0.0340025444  | -3.1528723863 | 2.0523681249  |
| H | 1.1281611102  | -1.7876774788 | 2.3294719823  |
| S | 2.5369879455  | -2.7883980822 | -0.2007920116 |
| H | 2.5418682275  | -2.893786889  | -1.5538480353 |
| S | 2.5362060321  | 2.7894874296  | 0.1997800564  |
| H | 2.5385679143  | 2.8973462316  | 1.5526443329  |
| S | -2.5371297421 | 2.7882669981  | -0.2008565335 |
| H | -2.5416492596 | 2.8933535068  | -1.5539389432 |
| S | -2.5361679463 | -2.7896433181 | 0.199102603   |
| H | -2.5384688626 | -2.8978682855 | 1.5519369175  |

**[(Al)Me<sub>2</sub>(2,6-(SH)<sub>2</sub>C<sub>6</sub>H<sub>3</sub>O)]<sub>2</sub> (6')**

0,1

|    |               |                |               |
|----|---------------|----------------|---------------|
| C  | -5.3244730538 | -0.6713228932  | -0.0585063876 |
| C  | -4.3960653137 | -1.7011155728  | 0.0620416549  |
| C  | -3.0235990262 | -1.4175204854  | 0.1182904139  |
| C  | -2.5804183166 | -0.0789882335  | 0.0484175597  |
| C  | -3.5297886965 | 0.9622836445   | -0.0308881476 |
| C  | -4.8981314237 | 0.6512609775   | -0.0889289872 |
| H  | -6.3900965095 | -0.90005518754 | -0.101300597  |
| H  | -4.7232584141 | -2.7394188903  | 0.1290423052  |
| H  | -5.6234463378 | 1.4643311999   | -0.1492115173 |
| O  | -1.2199715594 | 0.2104160614   | 0.0459594025  |
| Al | -0.0539556165 | 0.4073102751   | -1.4627990522 |
| Al | 0.054020417   | 0.4074840259   | 1.4626727079  |
| O  | 1.2200306332  | 0.2103770716   | -0.0460650435 |
| C  | 2.5804743757  | -0.0790401025  | -0.0484730055 |
| C  | 3.5298450598  | 0.9622361776   | 0.0307476965  |
| C  | 3.0236507335  | -1.4175822423  | -0.1181839641 |
| C  | 4.8981836292  | 0.6512136351   | 0.0888791553  |
| C  | 4.3961136703  | -1.7011775811  | -0.0618505319 |
| C  | 5.3245214346  | -0.6713753325  | 0.0586217144  |
| H  | 5.6234985596  | 1.4642873571   | 0.149107883   |
| H  | 4.7233033532  | -2.7394908545  | -0.1287162208 |
| H  | 6.3901418716  | -0.9006046418  | 0.1014901663  |
| C  | 0.0098007162  | 2.2518646329   | 2.148021505   |
| H  | 0.0082550455  | 3.0536711127   | 1.3938185186  |
| H  | -0.8799875113 | 2.4018857592   | 2.7820708151  |
| H  | 0.8897045114  | 2.4298289256   | 2.7877739039  |
| C  | -0.0096612536 | 2.2516137279   | -2.148359723  |
| H  | -0.0081060076 | 3.053506421    | -1.3942476827 |
| H  | 0.880146036   | 2.4015362353   | -2.7824060453 |
| H  | -0.8895437704 | 2.4295366203   | -2.7881524984 |
| C  | -0.1492320237 | -1.0510283704  | -2.7763576814 |
| C  | 0.1492106122  | -1.0507273415  | 2.7763787939  |
| H  | 0.842360121   | -1.3157774456  | -3.178236008  |
| H  | -0.6282625395 | -1.9754407014  | -2.4220975073 |
| H  | -0.7423128628 | -0.6905409563  | -3.6338583415 |



|   |               |               |               |
|---|---------------|---------------|---------------|
| H | 0.6283937508  | -1.9751148904 | 2.4222584967  |
| H | 0.7421014916  | -0.6901196624 | 3.6339594035  |
| H | -0.8424229304 | -1.3155586769 | 3.1781002924  |
| S | -3.117599793  | 2.6775594823  | -0.0976014718 |
| H | -1.8060156985 | 2.5428712666  | 0.1966840628  |
| S | -1.9414967364 | -2.8174278141 | 0.1990374408  |
| H | -0.938734249  | -2.2374366876 | 0.9006865268  |
| S | 3.1176513793  | 2.6775165451  | 0.0973262676  |
| H | 1.8060657363  | 2.5428068757  | -0.1969463774 |
| S | 1.9415376488  | -2.817491936  | -0.1987656948 |
| H | 0.9388048572  | -2.2375768426 | -0.9005202003 |

**[(Al)Me<sub>2</sub>(2,6-(F)<sub>2</sub>C<sub>6</sub>H<sub>3</sub>O)]<sub>2</sub> (7)**

0,1

|    |               |               |               |
|----|---------------|---------------|---------------|
| C  | -5.4227703674 | -0.0001146556 | -0.0004110098 |
| C  | -4.7247388920 | -1.2096420501 | -0.0004006205 |
| C  | -3.3366014272 | -1.1873783663 | -0.0002290154 |
| C  | -2.5853882877 | -0.0000446315 | -0.0000612660 |
| C  | -3.3366587418 | 1.1872540497  | -0.0000681047 |
| C  | -4.7247981529 | 1.2094464126  | -0.0002430521 |
| H  | -6.5088522998 | -0.0001410121 | -0.0005433397 |
| H  | -5.2333474559 | -2.1691742114 | -0.0005194336 |
| H  | -5.2334546668 | 2.1689533250  | -0.0002383665 |
| O  | -1.2276614557 | -0.0000194144 | 0.0001199750  |
| Al | 0.0000097878  | -1.5019011793 | 0.0002369769  |
| Al | -0.0000112247 | 1.5018988151  | 0.0001169770  |
| O  | 1.2276601761  | 0.0000176522  | 0.0004636633  |
| C  | 2.5853870727  | 0.0000440776  | 0.0001962497  |
| C  | 3.3366612561  | -1.1872525813 | 0.0001798420  |
| C  | 3.3365966878  | 1.1873797735  | -0.0000423882 |
| C  | 4.7248006927  | -1.2094410000 | -0.0001000700 |
| C  | 4.7247341119  | 1.2096473638  | -0.0003019296 |
| C  | 5.4227692840  | 0.0001220797  | -0.0003404063 |
| H  | 5.2334600473  | -2.1689464276 | -0.0001187101 |
| H  | 5.2333397157  | 2.1691810668  | -0.0004678003 |
| H  | 6.5088512022  | 0.0001515947  | -0.0005541161 |
| C  | 0.0000142360  | 2.3271886359  | -1.7902397203 |
| H  | -0.8845594052 | 2.0336253042  | -2.3755586185 |
| H  | 0.0008120997  | 3.4264405707  | -1.7417076546 |
| H  | 0.8838019267  | 2.0323766362  | -2.3761207330 |
| C  | 0.0004063018  | -2.3273303665 | -1.7900550068 |
| H  | 0.8846843368  | -2.0331213869 | -2.3754992323 |
| H  | 0.0004792624  | -3.4265789135 | -1.7414383079 |
| H  | -0.8836775045 | -2.0332538494 | -2.3758565921 |
| C  | -0.0003103992 | -2.3275099103 | 1.7904432446  |
| C  | -0.0001139933 | 2.3276488239  | 1.7902574755  |
| H  | 0.8838314671  | -2.0335299669 | 2.3762044380  |
| H  | -0.8845329985 | -2.0333217003 | 2.3759813985  |

|   |               |               |               |
|---|---------------|---------------|---------------|
| H | -0.0004345864 | -3.4267534512 | 1.7417139155  |
| H | 0.8844353453  | 2.0342474452  | 2.3756943895  |
| H | -0.0009248409 | 3.4268883550  | 1.7414423229  |
| H | -0.8839286934 | 2.0329738257  | 2.3761662126  |
| F | 2.6593201212  | 2.3660746692  | 0.0000642632  |
| F | -2.6594510512 | 2.3659855100  | 0.0001096682  |
| F | -2.6593285386 | -2.3660754152 | -0.0001894525 |
| F | 2.6594578519  | -2.3659864970 | 0.0003909343  |

**[(Al)Me<sub>2</sub>(2,6-(F)<sub>2</sub>C<sub>6</sub>H<sub>3</sub>O)]<sub>2</sub> (7')**

0,1

|    |               |               |               |
|----|---------------|---------------|---------------|
| C  | -5.3852700965 | -0.0000153308 | 0.0000014791  |
| C  | -4.6942489041 | 1.2128374464  | 0.0000820736  |
| C  | -3.3045221619 | 1.1950219118  | 0.000087865   |
| C  | -2.5686398835 | -0.0000002607 | 0.0000021264  |
| C  | -3.3045096255 | -1.1950304158 | -0.0000838131 |
| C  | -4.6942363654 | -1.2128609322 | -0.0000785685 |
| H  | -6.4753749723 | -0.0000207847 | 0.0000011905  |
| H  | -5.2105164896 | 2.172491937   | 0.0001460389  |
| H  | -5.2104940259 | -2.1725207763 | -0.0001429627 |
| O  | -1.2023348221 | 0.0000006975  | 0.0000017258  |
| Al | 0.0000017569  | -0.000191772  | 1.4816311305  |
| Al | -0.0000023955 | 0.0002482849  | -1.4816304508 |
| O  | 1.202333691   | 0.0000345307  | -0.0000010804 |
| C  | 2.5686387505  | -0.000000955  | -0.0000017175 |
| C  | 3.3045401264  | 1.1950096592  | 0.0002092595  |
| C  | 3.3044891746  | -1.1950427347 | -0.000212792  |
| C  | 4.6942673905  | 1.2128035197  | 0.000228667   |
| C  | 4.6942154188  | -1.2128948647 | -0.0002322218 |
| C  | 5.3852688341  | -0.0000604867 | -0.000001757  |
| H  | 5.2105505     | 2.1724496589  | 0.0004204018  |
| H  | 5.2104576475  | -2.1725629791 | -0.0004236737 |
| H  | 6.4753737099  | -0.0000841779 | -0.000001711  |
| C  | -0.0001591319 | -1.7366157308 | -2.3943741416 |
| H  | -0.8829561545 | -2.3346067065 | -2.1180761018 |
| H  | 0.0011739618  | -1.6316722863 | -3.4898583714 |
| H  | 0.8810780075  | -2.3359332099 | -2.1160028995 |
| C  | 0.0000468339  | -1.7373220409 | 2.3938676158  |
| H  | 0.8820629601  | -2.3358785078 | 2.1163209221  |
| H  | 0.0000756123  | -1.63271058   | 3.4893840359  |
| H  | -0.881973931  | -2.3358957536 | 2.1163706714  |
| C  | -0.0000329403 | 1.736690542   | 2.3943401684  |
| C  | 0.0001489743  | 1.7373967613  | -2.3938323668 |
| H  | 0.8820768505  | 2.335273627   | 2.1171404095  |
| H  | -0.8819596065 | 2.3354035234  | 2.1168436002  |
| H  | -0.0002197331 | 1.6317702826  | 3.4898273996  |
| H  | 0.882908326   | 2.3353238825  | -2.1172812321 |
| H  | -0.001115825  | 1.6328094321  | -3.4893503465 |

|   |               |               |               |
|---|---------------|---------------|---------------|
| H | -0.8811276902 | 2.3365861062  | -2.1153144607 |
| F | 2.6205410702  | -2.3601632969 | -0.0004830281 |
| F | -2.6205760541 | -2.3601572661 | -0.0001651269 |
| F | -2.6206047327 | 2.3601607036  | 0.0001686647  |
| F | 2.6206369449  | 2.3601543426  | 0.0004803779  |

**[(B)Me<sub>2</sub>(2,6-(OMe)<sub>2</sub>C<sub>6</sub>H<sub>3</sub>O)]<sub>2</sub> (9)**

0,1

|   |               |                |               |
|---|---------------|----------------|---------------|
| C | 4.9903436277  | 0.0388987043   | 0.8849305922  |
| C | 4.3782003122  | -1.1727551625  | 0.5798201718  |
| C | 3.1069123426  | -1.1905392445  | -0.0130266801 |
| C | 2.403509132   | 0.016274559    | -0.2481411115 |
| C | 3.0899259051  | 1.2346383105   | -0.0227492969 |
| C | 4.3613228524  | 1.2393598049   | 0.5701464136  |
| H | 5.9741442809  | 0.0476421148   | 1.3477428345  |
| H | 4.8894337912  | -2.1072260694  | 0.7828888768  |
| H | 4.8594312751  | 2.1824992371   | 0.7656289141  |
| O | 1.1100828504  | 0.0051399395   | -0.7455906806 |
| O | 2.4966026906  | -2.3388138153  | -0.4133182132 |
| O | 2.4638360024  | 2.3710838583   | -0.4323727092 |
| C | 2.934133141   | 3.6266805796   | 0.0466478069  |
| H | 2.2092325626  | 4.3646185011   | -0.30841133   |
| H | 2.976551178   | 3.6369138433   | 1.1458853306  |
| H | 3.9295848406  | 3.860457346    | -0.3601147095 |
| C | 2.9852964201  | -3.5839712024  | 0.0743929008  |
| H | 3.0283474206  | -3.5857404699  | 1.1736586994  |
| H | 2.2710297891  | -4.3348673704  | -0.2749965756 |
| H | 3.9838679667  | -3.8061557458  | -0.3312176443 |
| O | -1.1090476499 | -0.0102644022  | -0.7382043561 |
| C | -2.3990629624 | -0.0171640318  | -0.2318162225 |
| C | -3.083920836  | -1.2335848828  | 0.0084321871  |
| C | -3.1008617534 | 1.1915894608   | -0.0019875367 |
| C | -4.3512559266 | -1.2333004616  | 0.609982474   |
| C | -4.3681022082 | 1.1788096489   | 0.5996144871  |
| C | -4.9781432721 | -0.0302149966  | 0.918976182   |
| H | -4.8479954214 | -2.1747369016  | 0.8168064676  |
| H | -4.8779417202 | 2.1149696846   | 0.7983588     |
| H | -5.9587686562 | -0.03504500341 | 1.3885358055  |
| O | -2.4604940822 | -2.3734224893  | -0.395752506  |
| O | -2.493298009  | 2.3364799977   | -0.4159049348 |
| C | -2.9283398656 | -3.625085691   | 0.0957295584  |
| H | -2.2060680092 | -4.3660665546  | -0.2583433687 |
| H | -2.9637704283 | -3.6270051241  | 1.195267259   |
| H | -3.9264811883 | -3.8613987951  | -0.3028973271 |
| C | -2.9787573224 | 3.5856780136   | 0.0646128474  |
| H | -3.9800399263 | 3.8044819736   | -0.3361289971 |
| H | -3.0144347715 | 3.5966804873   | 1.1640914168  |
| H | -2.2668828863 | 4.3361011258   | -0.2958444173 |

|   |               |               |               |
|---|---------------|---------------|---------------|
| C | -0.0057783795 | 1.7243551712  | 0.9628835091  |
| H | 0.877410278   | 1.3804757765  | 1.5179727374  |
| H | -0.0135484455 | 2.8211782113  | 1.0037903688  |
| H | -0.8801176588 | 1.3678243127  | 1.5239824959  |
| C | 0.0183268079  | -1.7150470317 | 0.9772984019  |
| H | -0.8608680653 | -1.3660243611 | 1.53550962    |
| H | 0.0258469399  | -2.8114917912 | 1.0273945985  |
| H | 0.8966719205  | -1.3542610637 | 1.5293430775  |
| B | -0.0072006869 | 1.1914410071  | -0.5594278262 |
| B | 0.0095535596  | -1.1949939852 | -0.5494268686 |
| C | -0.0180054258 | 2.1354981528  | -1.8598062207 |
| C | 0.0117033025  | -2.1499993142 | -1.8418305671 |
| H | 0.8668957964  | 1.9613522715  | -2.4848628908 |
| H | -0.9044268057 | 1.94893726    | -2.4791090843 |
| H | -0.0245852602 | 3.2007244475  | -1.5911036568 |
| H | 0.0214781981  | -3.2129087639 | -1.5641694011 |
| H | -0.8780474191 | -1.982055253  | -2.4616667169 |
| H | 0.8932620279  | -1.9677992323 | -2.4693231948 |

**[(B)Me<sub>2</sub>(2,6-(OMe)<sub>2</sub>C<sub>6</sub>H<sub>3</sub>O)]<sub>2</sub> (9')**

0,1

|   |               |               |               |
|---|---------------|---------------|---------------|
| C | -5.218106953  | 0.0725959144  | 0.0666470898  |
| C | -4.5428250931 | -0.0108961632 | -1.1503911537 |
| C | -3.1376900774 | -0.0190356286 | -1.1613592894 |
| C | -2.4298549138 | 0.0570976421  | 0.054874224   |
| C | -3.1265307132 | 0.141006317   | 1.2770672322  |
| C | -4.5316793753 | 0.1485066847  | 1.2779700267  |
| H | -6.3058913279 | 0.078649802   | 0.0712498244  |
| H | -5.1015299348 | -0.0689252201 | -2.0797991015 |
| H | -5.0818819153 | 0.2126436635  | 2.2102468011  |
| O | -1.0574018632 | 0.0493787554  | 0.0491179497  |
| O | -2.3782843078 | -0.0969045651 | -2.2859007228 |
| O | -2.3568202871 | 0.2102083315  | 2.3951450382  |
| C | -3.0146112096 | 0.2972339026  | 3.6562596885  |
| H | -2.2161214435 | 0.3421260616  | 4.4021053806  |
| H | -3.6352119093 | 1.2040801491  | 3.7178165609  |
| H | -3.6451106019 | -0.5867225974 | 3.8362667274  |
| C | -3.0476511933 | -0.1759684172 | -3.5414494032 |
| H | -3.6695759888 | 0.7151552253  | -3.7158365928 |
| H | -2.2560491738 | -0.2296246388 | -4.2940257245 |
| H | -3.6789812056 | -1.0757017036 | -3.5980447741 |
| O | 1.0572499824  | 0.0372647023  | 0.0407304126  |
| C | 2.4297161936  | 0.0292482389  | 0.0353715254  |
| C | 3.126741196   | -0.0553839162 | -1.1865351186 |
| C | 3.1371798389  | 0.1057793115  | 1.2518256092  |
| C | 4.5319100599  | -0.063346211  | -1.1869795704 |
| C | 4.5422973732  | 0.097172072   | 1.2413107078  |

|   |               |               |               |
|---|---------------|---------------|---------------|
| C | 5.2179571431  | 0.0128926443  | 0.0245133529  |
| H | 5.0823644707  | -0.1280620292 | -2.1190663873 |
| H | 5.1007320654  | 0.1554572426  | 2.1690686854  |
| H | 6.3057410543  | 0.0064763031  | 0.0203019907  |
| O | 2.3573725428  | -0.1249498387 | -2.3048385177 |
| O | 2.3774497776  | 0.1845544496  | 2.3760475502  |
| C | 3.015582007   | -0.2112674406 | -3.5657993659 |
| H | 2.2173353971  | -0.2557638758 | -4.3119271274 |
| H | 3.6461278699  | 0.6727991631  | -3.7450673337 |
| H | 3.6361918179  | -1.1180837941 | -3.6276855837 |
| C | 3.0464050035  | 0.2630566387  | 3.6318391943  |
| H | 3.6678868711  | -0.6283707537 | 3.8062529412  |
| H | 3.6781146011  | 1.1625016426  | 3.6888514008  |
| H | 2.2545626289  | 0.3168961154  | 4.3841510273  |
| C | -0.0046057516 | -1.8856160056 | 1.5467259866  |
| H | -0.8904114859 | -2.5317933525 | 1.6474507517  |
| H | 0.8757081251  | -2.5404668377 | 1.6397978876  |
| H | 0.0025961267  | -1.1802368133 | 2.3841216460  |
| C | 0.0167626108  | 2.1526099175  | 1.2806988370  |
| H | 0.0170841107  | 1.5632745614  | 2.2034710661  |
| H | 0.9035827056  | 2.8052245480  | 1.2877875922  |
| H | -0.8624924257 | 2.8152690343  | 1.2947535752  |
| B | -0.0065207888 | -1.1558976234 | 0.1236856589  |
| B | 0.0063683079  | 1.2425824597  | -0.0342673888 |
| C | -0.0172802260 | -2.0654291538 | -1.1916345200 |
| C | 0.0050615086  | 1.9717576594  | -1.4575692247 |
| H | -0.9041323093 | -2.7179917860 | -1.1987670221 |
| H | -0.0178152432 | -1.4756662031 | -2.1141396342 |
| H | 0.8619814866  | -2.7280604209 | -1.2062448005 |
| H | -0.8746283166 | 2.6273050008  | -1.5513002686 |
| H | 0.8914884409  | 2.6171642548  | -1.5580598832 |
| H | -0.0022075220 | 1.2660631403  | -2.2946955038 |

**[(Ga)Me<sub>2</sub>(2,6-(OMe)<sub>2</sub>C<sub>6</sub>H<sub>3</sub>O)]<sub>2</sub> (10)**

0,1

|   |              |               |               |
|---|--------------|---------------|---------------|
| C | 5.1837689627 | -0.0069340056 | 0.9885363790  |
| C | 4.5430896853 | -1.2182083050 | 0.7219135667  |
| C | 3.2471948648 | -1.2124958209 | 0.1945420693  |
| C | 2.5589525756 | -0.0033914557 | -0.0495054271 |
| C | 3.2506857839 | 1.2038757246  | 0.1938898920  |
| C | 4.5465827934 | 1.2060543835  | 0.7212988208  |
| H | 6.1898095085 | -0.0082764156 | 1.4001074356  |
| H | 5.0501611395 | -2.1577550356 | 0.9162146627  |
| H | 5.0563808883 | 2.1442136500  | 0.9151673915  |
| O | 1.2889678741 | -0.0017117232 | -0.5102159664 |
| O | 2.5410263250 | -2.3452512911 | -0.1336731634 |
| O | 2.5478273662 | 2.3384789159  | -0.1348834877 |
| C | 3.0206409711 | 3.5925130759  | 0.3506222704  |

|    |               |               |               |
|----|---------------|---------------|---------------|
| H  | 2.2618444818  | 4.3271477405  | 0.0665612491  |
| H  | 3.1354791677  | 3.5698660346  | 1.4441281593  |
| H  | 3.9822267395  | 3.8549507875  | -0.1141388844 |
| C  | 3.0097454451  | -3.6003130860 | 0.3532083673  |
| H  | 3.1245999256  | -3.5768599032 | 1.4466882932  |
| H  | 2.2485874122  | -4.3327936602 | 0.0699059178  |
| H  | 3.9704892545  | -3.8663467798 | -0.1112400520 |
| O  | -1.2936289215 | 0.0015833071  | -0.5216784141 |
| C  | -2.5621968951 | 0.0032232708  | -0.0555406728 |
| C  | -3.2532375952 | -1.2039141731 | 0.1913426159  |
| C  | -3.2497619149 | 1.2121631159  | 0.1921304504  |
| C  | -4.5452739061 | -1.2061168057 | 0.7280865457  |
| C  | -4.5417914336 | 1.2178086918  | 0.7288446321  |
| C  | -5.1804381709 | 0.0066780647  | 1.0005977367  |
| H  | -5.0535603651 | -2.1444073070 | 0.9253007239  |
| H  | -5.0473619911 | 2.1574479892  | 0.9266158748  |
| H  | -6.1833021450 | 0.0079860868  | 1.4198561740  |
| O  | -2.5542959643 | -2.3389156867 | -0.1442886791 |
| O  | -2.5475053417 | 2.3453634441  | -0.1428132701 |
| C  | -3.0197991844 | -3.5926567823 | 0.3496222414  |
| H  | -2.2638883168 | -4.3269656235 | 0.0569137071  |
| H  | -3.1204857667 | -3.5679030689 | 1.4444307640  |
| H  | -3.9869954631 | -3.8568734449 | -0.1022455865 |
| C  | -3.0090968242 | 3.6001012086  | 0.3522836436  |
| H  | -3.9754889493 | 3.8677061561  | -0.0993016495 |
| H  | -3.1097957309 | 3.5746473325  | 1.4470694182  |
| H  | -2.2509397621 | 4.3323441683  | 0.0602102935  |
| C  | -0.0070009966 | 1.9583717240  | 1.6787457745  |
| H  | 0.8820685607  | 1.5105515825  | 2.1417408039  |
| H  | -0.0092070316 | 3.0323527506  | 1.9122835588  |
| H  | -0.8971374814 | 1.5079068744  | 2.1370925452  |
| C  | -0.0131472222 | -1.9587198369 | 1.6785710909  |
| H  | -0.9027908041 | -1.5065741835 | 2.1362085366  |
| H  | -0.0176262671 | -3.0327155465 | 1.9120020843  |
| H  | 0.8763960702  | -1.5126639878 | 2.1423684542  |
| C  | 0.0091790471  | -2.5998156073 | -2.0175046649 |
| C  | 0.0157048661  | 2.5998677310  | -2.0172250218 |
| H  | -0.9530956278 | -2.4806951354 | -2.5302530294 |
| H  | 0.8072241861  | -2.2078470943 | -2.6605390400 |
| H  | 0.1901138667  | -3.6744407420 | -1.8711725467 |
| H  | -0.9469618702 | 2.4837870282  | -2.5299408505 |
| H  | 0.1999275663  | 3.6739079001  | -1.8707077584 |
| H  | 0.8125081520  | 2.2055738373  | -2.6603728299 |
| Ga | -0.0003247215 | 1.6123152456  | -0.2897716581 |
| Ga | -0.0040818154 | -1.6124703144 | -0.2899024917 |

**[(Ga)Me<sub>2</sub>(2,6-(OMe)<sub>2</sub>C<sub>6</sub>H<sub>3</sub>O)]<sub>2</sub> (10')**

0,1

|   |               |               |               |
|---|---------------|---------------|---------------|
| C | 5.4133554826  | -0.000043376  | 0.0001777284  |
| C | 4.7289259327  | 0.0000698328  | -1.2157807164 |
| C | 3.3251929855  | 0.0000891452  | -1.2177483002 |
| C | 2.6107883537  | 0.0000025194  | 0.0000350046  |
| C | 3.3250695683  | -0.0001071255 | 1.2178889641  |
| C | 4.72880165    | -0.0001339175 | 1.2160661992  |
| H | 6.5009484905  | -0.0000607575 | 0.0002333909  |
| H | 5.2825589904  | 0.0001454023  | -2.1486658218 |
| H | 5.2823374994  | -0.0002260578 | 2.1490091743  |
| O | 1.2486062754  | 0.0000265358  | -0.0000240035 |
| O | 2.5523050997  | 0.0002224235  | -2.3455820042 |
| O | 2.5520609994  | -0.0002100220 | 2.3456375857  |
| C | 3.2174783362  | -0.0003428132 | 3.6059793651  |
| H | 2.4246817861  | -0.0004073800 | 4.3595226427  |
| H | 3.8450292513  | -0.8970937471 | 3.7232278069  |
| H | 3.8450498054  | 0.8963708075  | 3.7234029888  |
| C | 3.2178591641  | 0.0003384942  | -3.6058528916 |
| H | 3.8454135071  | -0.8963953249 | -3.7232124062 |
| H | 2.4251445085  | 0.0004321611  | -4.3594824858 |
| H | 3.8454519178  | 0.8970692655  | -3.7230303587 |
| O | -1.2486054709 | 0.0000712988  | 0.0000296296  |
| C | -2.6107875329 | 0.0000967075  | 0.0000373889  |
| C | -3.3251170511 | -0.0000056668 | 1.2178623558  |
| C | -3.3251435815 | 0.0002223857  | -1.2177749594 |
| C | -4.7288494529 | 0.0000007266  | 1.2159812550  |
| C | -4.7288762194 | 0.0002635651  | -1.2158657458 |
| C | -5.4133544916 | 0.0001439731  | 0.0000650674  |
| H | -5.2824241592 | -0.0001109900 | 2.1489010512  |
| H | -5.2824704202 | 0.0003906003  | -2.1487740387 |
| H | -6.5009475015 | 0.0001611001  | 0.0000770495  |
| O | -2.5521561986 | -0.0002156669 | 2.3456454196  |
| O | -2.5522074549 | 0.0003945829  | -2.3455737132 |
| C | -3.2176324111 | -0.0004225651 | 3.6059566339  |
| H | -2.4248713591 | -0.0005684822 | 4.3595373905  |
| H | -3.8451802998 | 0.8963027939  | 3.7234159948  |
| H | -3.8452174860 | -0.8971618867 | 3.7231098371  |
| C | -3.2177020814 | 0.0005975032  | -3.6058754237 |
| H | -3.8452829316 | -0.8961082815 | -3.7233084827 |
| H | -3.8452577549 | 0.8973561138  | -3.7230393647 |
| H | -2.4249515980 | 0.0007002539  | -4.3594671631 |
| C | 0.0001786417  | 2.4161072938  | 1.8183442611  |
| H | 0.8888574919  | 2.0820853110  | 2.3684307211  |
| H | -0.0002311789 | 3.5134849279  | 1.7731909979  |
| H | -0.8879820240 | 2.0814282446  | 2.3688635261  |
| C | -0.0000411589 | -2.4161348299 | 1.8181655514  |
| H | -0.8884229179 | -2.0817561228 | 2.3685174136  |
| H | -0.0001260258 | -3.5135088894 | 1.7729335219  |

|    |               |               |               |
|----|---------------|---------------|---------------|
| H  | 0.8884177168  | -2.0818906913 | 2.3684710982  |
| C  | -0.0000538739 | -2.4159875703 | -1.8183509192 |
| C  | -0.0000878155 | 2.4162141999  | -1.8181710053 |
| H  | -0.8885437014 | -2.0817271924 | -2.3685934977 |
| H  | 0.8882957378  | -2.0815297386 | -2.3687022661 |
| H  | 0.0000699626  | -3.5133660790 | -1.7732155330 |
| H  | -0.8887650425 | 2.0822358074  | -2.3682879620 |
| H  | 0.0003363971  | 3.5135889189  | -1.7729542172 |
| H  | 0.8880751233  | 2.0815555371  | -2.3687010534 |
| Ga | 0.0000296558  | 1.5905741970  | 0.0000629871  |
| Ga | -0.0000296652 | -1.5904760306 | -0.0000588990 |

**[(In)Me<sub>2</sub>(2,6-(OMe)<sub>2</sub>C<sub>6</sub>H<sub>3</sub>O)]<sub>2</sub> (11)**

0,1

|   |               |               |               |
|---|---------------|---------------|---------------|
| C | -5.1803115520 | -0.0003990209 | -0.8956503816 |
| C | -4.5588090809 | -1.2119848898 | -0.5872798516 |
| C | -3.3069509807 | -1.2077391806 | 0.0351745697  |
| C | -2.6318444263 | -0.0017993996 | 0.3459384004  |
| C | -3.3119357128 | 1.2045974310  | 0.0482040899  |
| C | -4.5636426338 | 1.2102754912  | -0.5747174970 |
| H | -6.1523269009 | 0.0001754343  | -1.3818935036 |
| H | -5.0495853006 | -2.1499190881 | -0.8266951729 |
| H | -5.0580778377 | 2.1487908047  | -0.8041844428 |
| O | -1.4133766006 | -0.0023911532 | 0.9025590928  |
| O | -2.6295845956 | -2.3518034922 | 0.4048537110  |
| O | -2.6404830678 | 2.3478175633  | 0.4316206344  |
| C | -3.0971117272 | 3.6015985387  | -0.0702518710 |
| H | -2.3743098829 | 4.3444765208  | 0.2804010919  |
| H | -3.1313139223 | 3.5941036994  | -1.1695382839 |
| H | -4.0942221414 | 3.8418198016  | 0.3260052959  |
| C | -3.0916565853 | -3.6043508013 | -0.0944964745 |
| H | -3.1373065904 | -3.5953470776 | -1.1933489205 |
| H | -2.3654656675 | -4.3478771165 | 0.2475857206  |
| H | -4.0848660650 | -3.8445452181 | 0.3115445478  |
| O | 1.4172164361  | 0.0017626147  | 0.9059354620  |
| C | 2.6350461721  | 0.0017259957  | 0.3476073871  |
| C | 3.3150026398  | -1.204340052  | 0.0474205754  |
| C | 3.3099129853  | 1.2078651303  | 0.0364396561  |
| C | 4.5641300486  | -1.2094041608 | -0.5806547590 |
| C | 4.5592276334  | 1.2125503676  | -0.5911334591 |
| C | 5.1794193861  | 0.0013954774  | -0.9035020736 |
| H | 5.0577713850  | -2.1477376998 | -0.8125445750 |
| H | 5.0491735831  | 2.1506973952  | -0.8313813949 |
| H | 6.1491817292  | 0.0012494283  | -1.3942236149 |
| O | 2.6465231981  | -2.3483402037 | 0.4338610178  |
| O | 2.6355370727  | 2.3521477906  | 0.4111793364  |
| C | 3.0990015547  | -3.6009944061 | -0.0750631731 |
| H | 2.3787174277  | -4.3447745473 | 0.2789111599  |



|    |               |               |               |
|----|---------------|---------------|---------------|
| H  | 3.1249966965  | -3.5902342984 | -1.1745345906 |
| H  | 4.0990104314  | -3.8426996713 | 0.3129065225  |
| C  | 3.0928098386  | 3.6041830235  | -0.0944202589 |
| H  | 4.0888774275  | 3.8461387446  | 0.3034972128  |
| H  | 3.1301866351  | 3.5926685754  | -1.1935354725 |
| H  | 2.3687174009  | 4.3479991560  | 0.2514970387  |
| C  | -0.0037575726 | 1.9226667868  | -1.5684894514 |
| H  | -0.9350156615 | 1.4914906885  | -1.9526243333 |
| H  | 0.0768258641  | 2.9627924814  | -1.9065953060 |
| H  | 0.8471468416  | 1.3519350057  | -1.9565848266 |
| C  | 0.0142148936  | -1.9211247410 | -1.5709889704 |
| H  | 0.9490072661  | -1.4949404671 | -1.9520351638 |
| H  | -0.0716066808 | -2.9605115236 | -1.9100616694 |
| H  | -0.8322545765 | -1.3451960625 | -1.9611537138 |
| C  | -0.0089000966 | -2.7982463185 | 2.5213038182  |
| C  | -0.0048843108 | 2.7951088594  | 2.5252078693  |
| H  | 0.9749441643  | -2.6896835341 | 2.9901861878  |
| H  | -0.7751930133 | -2.3353842153 | 3.1529200869  |
| H  | -0.2387819186 | -3.8643742540 | 2.4039536717  |
| H  | 0.9834102254  | 2.6920871056  | 2.9859486963  |
| H  | -0.2425779933 | 3.8599199250  | 2.4116053645  |
| H  | -0.7629387110 | 2.3263561369  | 3.1624030520  |
| In | -0.0013324104 | 1.7833243319  | 0.6052980834  |
| In | 0.0044052797  |               |               |

**[(In)Me<sub>2</sub>(2,6-(OMe)<sub>2</sub>C<sub>6</sub>H<sub>3</sub>O)]<sub>2</sub> (11')**

0,1

|   |               |               |               |
|---|---------------|---------------|---------------|
| C | -5.5120420000 | 0.0007180000  | -0.0000160000 |
| C | -4.8257390000 | -1.2149550000 | -0.0002060000 |
| C | -3.4227330000 | -1.2158420000 | -0.0002050000 |
| C | -2.6999660000 | 0.0000570000  | -0.0000130000 |
| C | -3.4221690000 | 1.2162940000  | 0.0001790000  |
| C | -4.8251720000 | 1.2160700000  | 0.0001760000  |
| H | -6.5995730000 | 0.0009730000  | -0.0000160000 |
| H | -5.3796160000 | -2.1480080000 | -0.0003600000 |
| H | -5.3786100000 | 2.1493840000  | 0.0003310000  |
| O | -1.3505880000 | -0.0002520000 | -0.0000070000 |
| O | -2.6473780000 | -2.3468690000 | -0.0004140000 |
| O | -2.6462710000 | 2.3469420000  | 0.0003980000  |
| C | -3.3135340000 | 3.6052720000  | 0.0000604000  |
| H | -2.5229440000 | 4.3615320000  | 0.0007570000  |
| H | -3.9422220000 | 3.7224770000  | -0.8956980000 |
| H | -3.9422640000 | 3.7221630000  | 0.8969180000  |
| C | -3.3152740000 | -3.6048650000 | -0.0006060000 |
| H | -3.9440610000 | -3.7214470000 | -0.8969190000 |
| H | -2.5250690000 | -4.3615270000 | -0.0007470000 |
| H | -3.9440220000 | -3.7217380000 | 0.8956970000  |
| O | 1.3505870000  | 0.0001840000  | 0.0000110000  |

|    |               |               |               |
|----|---------------|---------------|---------------|
| C  | 2.6999650000  | 0.0000700000  | 0.0000150000  |
| C  | 3.4225660000  | 1.2160700000  | 0.0002270000  |
| C  | 3.4223340000  | -1.2160660000 | -0.0001960000 |
| C  | 4.8255700000  | 1.2153760000  | 0.0002170000  |
| C  | 4.8253370000  | -1.2156490000 | -0.0001840000 |
| C  | 5.5120400000  | -0.0002020000 | 0.0000170000  |
| H  | 5.3793200000  | 2.1485060000  | 0.0003680000  |
| H  | 5.3789040000  | -2.1488870000 | -0.0003330000 |
| H  | 6.5995720000  | -0.0003060000 | 0.0000170000  |
| O  | 2.6470610000  | 2.3469920000  | 0.0004080000  |
| O  | 2.6465830000  | -2.3468180000 | -0.0003790000 |
| C  | 3.3147980000  | 3.6050720000  | 0.0005350000  |
| H  | 2.5244960000  | 4.3616340000  | 0.0006300000  |
| H  | 3.9435660000  | 3.7217840000  | 0.8968450000  |
| H  | 3.9435350000  | 3.7219790000  | -0.8957710000 |
| C  | 3.3140040000  | -3.6050640000 | -0.0005900000 |
| H  | 3.9427390000  | -3.7218740000 | -0.8969100000 |
| H  | 3.9427160000  | -3.7221890000 | 0.8957060000  |
| H  | 2.5235090000  | -4.3614240000 | -0.0007320000 |
| C  | -0.0004860000 | 2.0716410000  | 2.4484900000  |
| H  | -0.8965490000 | 2.5485190000  | 2.0372380000  |
| H  | 0.0015810000  | 2.1461650000  | 3.5412360000  |
| H  | 0.8932210000  | 2.5498950000  | 2.0337290000  |
| C  | -0.0001830000 | 2.0731920000  | -2.4473140000 |
| H  | 0.8946210000  | 2.5506230000  | -2.0339680000 |
| H  | -0.0001010000 | 2.1483240000  | -3.5400200000 |
| H  | -0.8951570000 | 2.5504140000  | -2.0341070000 |
| C  | 0.0002310000  | -2.0719980000 | -2.4481520000 |
| C  | 0.0004480000  | -2.0735470000 | 2.4469890000  |
| H  | 0.8953950000  | -2.5492950000 | -2.0354360000 |
| H  | -0.8943830000 | -2.5496870000 | -2.0346890000 |
| H  | -0.0002110000 | -2.1467060000 | -3.5408870000 |
| H  | 0.8964370000  | -2.5501540000 | 2.0352650000  |
| H  | -0.0014720000 | -2.1488590000 | 3.5396820000  |
| H  | -0.8933420000 | -2.5514510000 | 2.0320050000  |
| In | -0.0000130000 | -0.0007090000 | 1.7733740000  |
| In | 0.0000140000  | 0.0004610000  | -1.7733700000 |

**[(Ti)Me<sub>2</sub>(2,6-(OMe)<sub>2</sub>C<sub>6</sub>H<sub>3</sub>O)]<sub>2</sub> (12)**

0,1

|   |              |               |               |
|---|--------------|---------------|---------------|
| C | 5.3558913009 | -0.0072500277 | 1.1654133769  |
| C | 4.7248186863 | -1.2158071555 | 0.8636989758  |
| C | 3.4590581369 | -1.2103295435 | 0.2703074929  |
| C | 2.7604397567 | -0.0036117924 | -0.0251746445 |
| C | 3.4624482600 | 1.2011399076  | 0.2702872763  |
| C | 4.7282250657 | 1.2030730775  | 0.8636673972  |
| H | 6.3390449688 | -0.0086322176 | 1.6287229445  |
| H | 5.2246308909 | -2.1535512345 | 1.0857242028  |

|   |               |               |               |
|---|---------------|---------------|---------------|
| H | 5.2306772808  | 2.1394097027  | 1.0856743839  |
| O | 1.5479344912  | -0.0019116417 | -0.5566952554 |
| O | 2.7829071777  | -2.3656496531 | -0.0879091515 |
| O | 2.7895434953  | 2.3583574131  | -0.0879761086 |
| C | 3.3279124013  | 3.6041630826  | 0.3383743775  |
| H | 2.6146895559  | 4.3684728855  | 0.0122060010  |
| H | 3.4371467373  | 3.6349873814  | 1.4334505841  |
| H | 4.3070920866  | 3.7932950400  | -0.1267012597 |
| C | 3.3179321303  | -3.6129551188 | 0.3382618955  |
| H | 3.4271066440  | -3.6442250837 | 1.4333328696  |
| H | 2.6026650292  | -4.3753091949 | 0.0119963461  |
| H | 4.2965932165  | -3.8046436660 | -0.1268582883 |
| O | -1.5424257979 | 0.0019217466  | -0.5608515927 |
| C | -2.7568708241 | 0.0035676940  | -0.0343644437 |
| C | -3.4605848090 | -1.2010916030 | 0.2584183743  |
| C | -3.4570681863 | 1.2101294336  | 0.2589952387  |
| C | -4.7256106377 | -1.2030721477 | 0.8533076849  |
| C | -4.7220828950 | 1.2154950510  | 0.8538861016  |
| C | -5.3528417409 | 0.0070599092  | 1.1566427158  |
| H | -5.2281364890 | -2.1394811634 | 1.0748646726  |
| H | -5.2218793965 | 2.1532666395  | 1.0758676328  |
| H | -6.3349172169 | 0.0083885131  | 1.6222198217  |
| O | -2.7897803339 | -2.3585544540 | -0.1038697848 |
| O | -2.7829848763 | 2.3658424181  | -0.1027227499 |
| C | -3.3252892222 | -3.6042480659 | 0.3271449938  |
| H | -2.6143015698 | -4.3687360173 | -0.0034245688 |
| H | -3.4272485586 | -3.6340257222 | 1.4229494638  |
| H | -4.3075496071 | -3.7939108135 | -0.1311410962 |
| C | -3.3148909362 | 3.6127609593  | 0.3292022049  |
| H | -4.2966611558 | 3.8055268388  | -0.1288426902 |
| H | -3.4166426442 | 3.6420766257  | 1.4250370654  |
| H | -2.6017877327 | 4.3754760590  | -0.0009083601 |
| C | 0.0015066008  | 1.8892142935  | 1.8872872052  |
| H | 0.9006190271  | 1.3457930311  | 2.1907630596  |
| H | 0.0044917702  | 2.9009867157  | 2.3062177438  |
| H | -0.9019606897 | 1.3518110852  | 2.1885929868  |
| C | -0.0031809709 | -1.8883126544 | 1.8874597771  |
| H | -0.9046421875 | -1.3476344970 | 2.1889242628  |
| H | -0.0035787392 | -2.8999212337 | 2.3067940733  |
| H | 0.8979536887  | -1.3479017153 | 2.1903114444  |
| C | -0.0040312078 | -2.4350243230 | -2.4301728624 |
| C | 0.0015083495  | 2.4336204247  | -2.4306480628 |
| H | -1.0456442399 | -2.4904999780 | -2.7578146967 |
| H | 0.5186715559  | -1.6061902811 | -2.9150943661 |
| H | 0.5194429608  | -3.3787326099 | -2.6129454460 |
| H | -1.0399908753 | 2.5068961239  | -2.7551976257 |
| H | 0.5408786425  | 3.3678295152  | -2.6159216042 |
| H | 0.5080852124  | 1.5953608954  | -2.9164732282 |

|    |               |               |               |
|----|---------------|---------------|---------------|
| Tl | 0.0045789212  | 1.9510098099  | -0.3031451898 |
| Tl | -0.0009455009 | -1.9509636640 | -0.3029645711 |

**[(Tl)Me<sub>2</sub>(2,6-(OMe)<sub>2</sub>C<sub>6</sub>H<sub>3</sub>O)]<sub>2</sub> (12')**

0,1

|   |               |               |               |
|---|---------------|---------------|---------------|
| C | -5.6058336730 | 0.0005336206  | -0.0000108273 |
| C | -4.9148739023 | -1.2129988213 | 0.0001056122  |
| C | -3.5132086265 | -1.2124631342 | 0.0000400031  |
| C | -2.7724730821 | 0.0001829183  | -0.0000017416 |
| C | -3.5128982014 | 1.2130063236  | -0.0000461439 |
| C | -4.9145623096 | 1.2138903418  | -0.0001212040 |
| H | -6.6932683970 | 0.0006721511  | -0.0000142007 |
| H | -5.4688142434 | -2.1464405304 | 0.0002266159  |
| H | -5.4682647617 | 2.1474723600  | -0.0002442903 |
| O | -1.4389561847 | -0.0000046422 | 0.0000013459  |
| O | -2.7440718647 | -2.3558969982 | 0.0000193744  |
| O | -2.7434584406 | 2.3562350724  | -0.0000140208 |
| C | -3.4224405170 | 3.6061485681  | -0.0005859299 |
| H | -2.6406679724 | 4.3724127608  | -0.0005392966 |
| H | -4.0533354333 | 3.7182530365  | -0.8964772307 |
| H | -4.0539561736 | 3.7187763606  | 0.8948157249  |
| C | -3.4233838366 | -3.6056338719 | 0.0005738724  |
| H | -4.0549184472 | -3.7180896658 | -0.8948357690 |
| H | -2.6418152268 | -4.3721066081 | 0.0005286409  |
| H | -4.0543355550 | -3.7175826081 | 0.8964584902  |
| O | 1.4389506048  | -0.0000711293 | 0.0000003731  |
| C | 2.7724667081  | -0.0001302034 | 0.0000002524  |
| C | 3.5130706456  | 1.2125940366  | 0.0001567594  |
| C | 3.5130175579  | -1.2128771151 | -0.0001625047 |
| C | 4.9147354726  | 1.2132797545  | 0.0000892318  |
| C | 4.9146821624  | -1.2136112977 | -0.0000916468 |
| C | 5.6058236408  | -0.0001798253 | 0.0000012970  |
| H | 5.4685758979  | 2.1467810434  | 0.0001245180  |
| H | 5.4684852405  | -2.1471335665 | -0.0001308538 |
| H | 6.6932583874  | -0.0002021911 | 0.0000017985  |
| O | 2.7438059486  | 2.3559415523  | 0.0003703399  |
| O | 2.7436957612  | -2.3561854550 | -0.0003956613 |
| C | 3.4229847051  | 3.6057505514  | 0.0002023537  |
| H | 2.6413345474  | 4.3721400090  | 0.0004135198  |
| H | 4.0544549843  | 3.7180221420  | 0.8956801099  |
| H | 4.0539782628  | 3.7180171177  | -0.8956137347 |
| C | 3.4228049983  | -3.6060303872 | -0.0002196299 |
| H | 4.0542775475  | -3.7183377908 | -0.8956914252 |
| H | 4.0537861510  | -3.7183279977 | 0.8956014074  |
| H | 2.6411097786  | -4.3723733933 | -0.0004356666 |
| C | 0.0000040784  | 2.1778301280  | 2.2058212106  |
| H | -0.9028379779 | 2.5286528647  | 1.6998169844  |

|    |               |               |               |
|----|---------------|---------------|---------------|
| H  | 0.0025738237  | 2.4473288979  | 3.2667213470  |
| H  | 0.9002812211  | 2.5288796004  | 1.6954224830  |
| C  | 0.0004451140  | 2.1806663661  | -2.2034975121 |
| H  | 0.9027561961  | 2.5307022832  | -1.6960198951 |
| H  | -0.0008797122 | 2.4513653531  | -3.2640866976 |
| H  | -0.9003206814 | 2.5312037777  | -1.6936338608 |
| C  | -0.0004026272 | -2.1779465734 | -2.2057480773 |
| C  | 0.0000123582  | -2.1807827719 | 2.2034328815  |
| H  | 0.9005838435  | -2.5290845479 | -1.6966658197 |
| H  | -0.9025406773 | -2.5286430313 | -1.6984013252 |
| H  | 0.0005458208  | -2.4474814630 | -3.2666420126 |
| H  | 0.9028970618  | -2.5309372478 | 1.6970630607  |
| H  | -0.0026903738 | -2.4515160429 | 3.2640110152  |
| H  | -0.9001755927 | -2.5311671159 | 1.6924426693  |
| TI | 0.0000075528  | -0.0013252032 | 1.9384543030  |
| TI | 0.0000044132  | 0.0012172413  | -1.9384516172 |
